# Supplementary material for: Defining the nature of human pluripotent stem cell-derived interneurons via single-cell analysis
Source: PubMed Central journal article supplement — Stem Cell Reports. 2021 Sep 9;16(10):2548–64. doi: 10.1016/j.stemcr.2021.08.006 (PMC8514853; doi:10.1016/j.stemcr.2021.08.006), 2021-09-09
Supplement: mmc2.pdf [file mmc2.pdf]

## Defining the nature of human pluripotent stem cell-derived interneurons via single-cell analysis

Thomas Allison,<sup>4,13</sup> Justin Langerman,<sup>4,13</sup> Shan Sabri,<sup>4,9</sup> Marcos Otero-Garcia,<sup>6</sup> Andrew Lund,<sup>1</sup> John Huang,<sup>4</sup> Xiaofei Wei,<sup>11</sup> Ranmal A. Samarasinghe,<sup>2,10,11,12</sup> Damon Polioudakis,<sup>5</sup> Istvan Mody,<sup>11</sup> Inma Cobos,<sup>7</sup> Bennett G. Novitch,<sup>2,10,12</sup> Daniel H. Geschwind,<sup>5,6,12</sup> Kathrin Plath,<sup>2,3,4,8,9,\*</sup> and William E. Lowry<sup>1,2,3,8,12,\*</sup>

<sup>1</sup>Department of Molecular Cell and Developmental Biology, UCLA, Los Angeles, CA, USA

<sup>2</sup>Broad Stem Cell Center for Regenerative Medicine, UCLA, Los Angeles, CA, USA

<sup>3</sup>Molecular Biology Institute, UCLA, Los Angeles, CA, USA

<sup>4</sup>Department of Biological Chemistry, David Geffen School of Medicine, UCLA, Los Angeles, CA, USA

<sup>5</sup>Program in Neurogenetics, Department of Neurology and Department of Human Genetics, David Geffen School of Medicine, UCLA, Los Angeles, CA, USA

<sup>6</sup>Center for Autism Research and Treatment, Semel Institute, UCLA, Los Angeles, CA, USA

<sup>7</sup>Department of Pathology, David Geffen School of Medicine, UCLA, Los Angeles, CA, USA

<sup>8</sup>Jonsson Comprehensive Cancer Center, David Geffen School of Medicine, UCLA, Los Angeles, CA, USA

<sup>9</sup>Bioinformatics PhD Program, UCLA, Los Angeles, CA, USA

<sup>10</sup>Department of Neurobiology, UCLA, Los Angeles, CA, USA

<sup>11</sup>Department of Neurology, David Geffen School of Medicine UCLA, Los Angeles, CA, USA

<sup>12</sup>Intellectual and Developmental Disabilities Research Center, UCLA, Los Angeles, CA, USA

<sup>13</sup>These author contributed equally

\*Correspondence: [kplath@mednet.ucla.edu](mailto:kplath@mednet.ucla.edu) (K.P.), [blowry@ucla.edu](mailto:blowry@ucla.edu) (W.E.L.)

<https://doi.org/10.1016/j.stemcr.2021.08.006>

### SUMMARY

The specification of inhibitory neurons has been described for the mouse and human brain, and many studies have shown that pluripotent stem cells (PSCs) can be used to create interneurons *in vitro*. It is unclear whether *in vitro* methods to produce human interneurons generate all the subtypes found in brain, and how similar *in vitro* and *in vivo* interneurons are. We applied single-nuclei and single-cell transcriptomics to model interneuron development from human cortex and interneurons derived from PSCs. We provide a direct comparison of various *in vitro* interneuron derivation methods to determine the homogeneity achieved. We find that PSC-derived interneurons capture stages of development prior to mid-gestation, and represent a minority of potential subtypes found in brain. Comparison with those found in fetal or adult brain highlighted decreased expression of synapse-related genes. These analyses highlight the potential to tailor the method of generation to drive formation of particular subtypes.

### INTRODUCTION

Cortical inhibitory neurons (interneurons) are a critical component of the nervous system and act to regulate the degree of electrical excitation through direct interaction with excitatory and inhibitory neurons (Gelman et al., 2011, 2012; Gelman and Marin, 2010; Lim et al., 2018; Wonders and Anderson, 2006). Born from progenitor cells in the embryonic subpallidum, interneurons develop over a protracted period, undergoing important milestones of specification, migration, and maturation toward their ultimate function of cortical modulation (Gelman et al., 2012; Gelman and Marin, 2010). Many reports have elucidated the diversity and maturation of interneurons in mouse models (Boldog et al., 2018; Butt et al., 2017; Darmanis et al., 2015; Ghanem et al., 2008; Lim et al., 2018; Mayer et al., 2018; Wamsley and Fishell, 2017). Much less is known about the mechanisms through which interneurons acquire a mature state in the human context, and it has proven to be difficult to generate mature interneurons *in vitro* from human pluripotent stem cells (PSCs) as measured by their

ability to generate repeated fast-spiking action potentials (Maroof et al., 2013).

Proper interneuron function is crucial for the appropriate establishment and activity of neural networks in the central nervous system (CNS) (Cobos et al., 2005). This is most apparent through the knowledge that defective interneurons are implicated in diverse human conditions such as intellectual disability (ID) (Chao et al., 2010, 2020; Ito-Ishida et al., 2015; Patra and Turner, 2014; Turner et al., 2002a, 2002b; Ure et al., 2016), Alzheimer disease (Martinez-Losa et al., 2018), and epilepsy (Cobos et al., 2005). With the advent of human PSCs, it is possible to generate interneurons *in vitro*, which have been utilized to model such diseases (Blair et al., 2018; Ohashi et al., 2018). This approach, however, has been stymied by the finding that PSC-derived cells, as in the developing brain, develop over an extended time, making applications such as disease modeling or cell therapy challenging (Nicholas et al., 2013). However, it is formally possible that PSCs do produce a small number of mature cells that are difficult to detect among a culture nearly full of immature neurons.

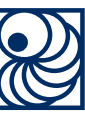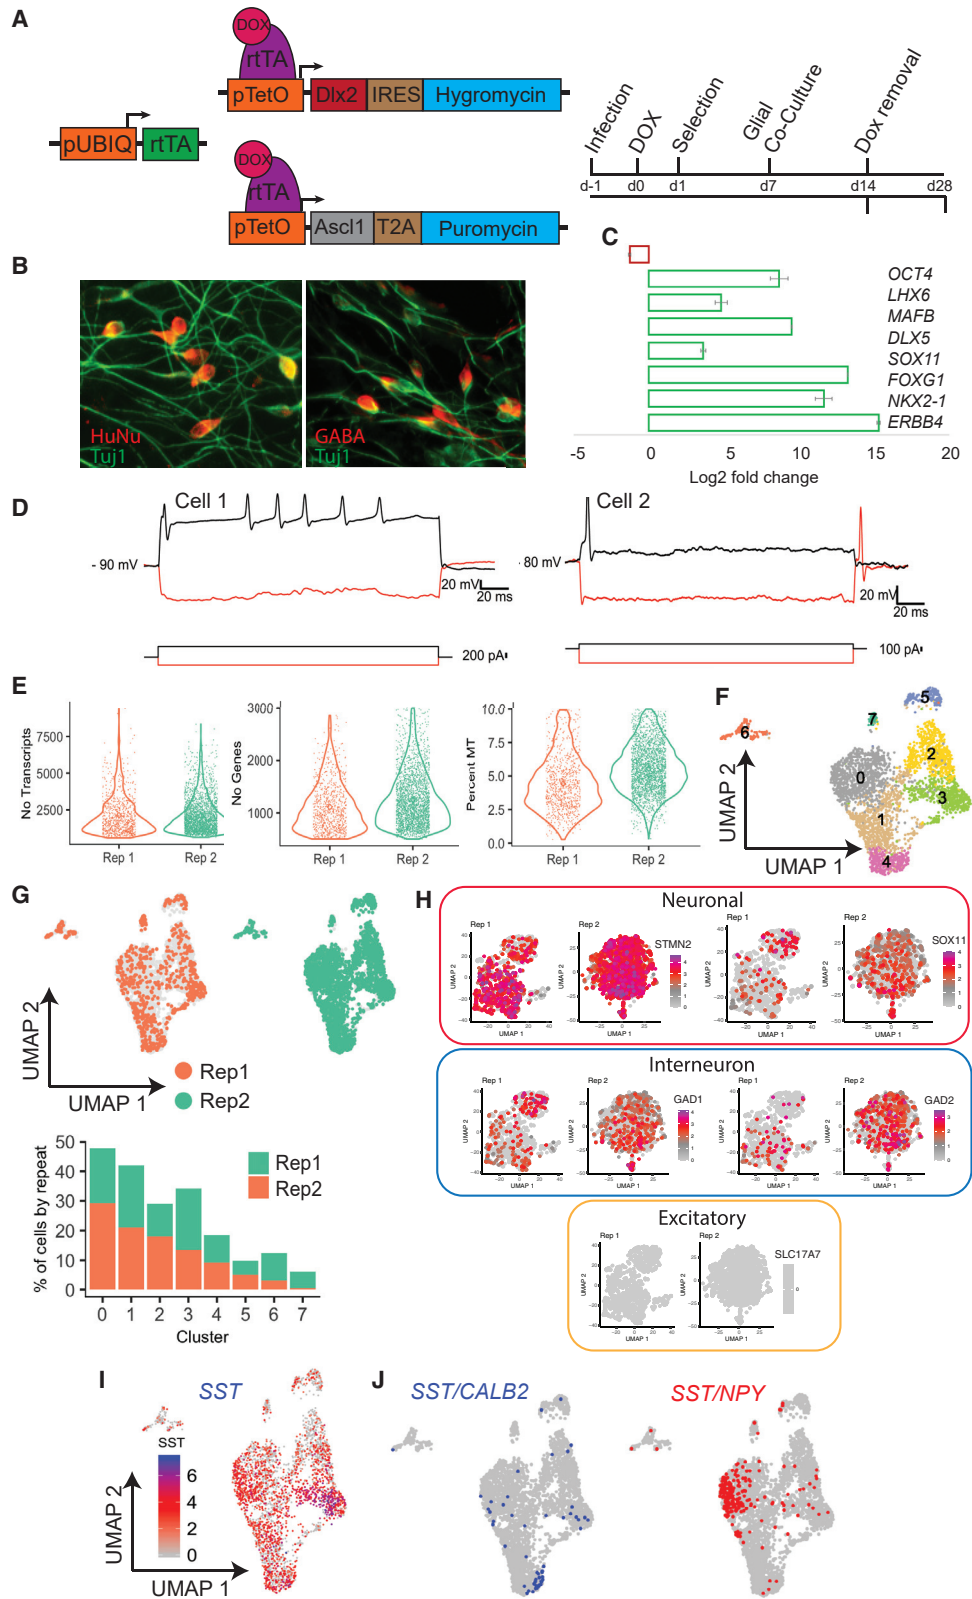

(legend on next page)

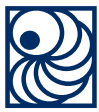

To begin to uncover the diversity and maturation mechanisms of cortical interneurons within the human context through development, single-cell approaches have proven to be useful. Over the past several years, advances in high-throughput single-cell RNA sequencing (scRNA-seq) techniques have allowed for a detailed picture of the transcriptional state of individual cells for the purpose of identifying cell types from a wide variety of tissues and in a variety of species (Macosko et al., 2015; Saunders et al., 2018; Zeisel et al., 2015). The human brain was until recently a more difficult target for these studies due to the availability of tissue and complications of dissociation of this tissue to single-cell suspension. To circumvent these issues, it is now possible to access human *post mortem* frozen brain, isolate nuclei, and profile the RNA from individual nuclei (Habib et al., 2017; Lake et al., 2016). Importantly, it has been established that sequencing specifically neuronal nuclei generates comparable transcriptomics data to whole-cell sequencing despite typically yielding fewer reads per cell (Lake et al., 2016).

Here, we used single-cell and single-nuclei transcriptomics to compare *in vitro*-derived interneurons with those in the fetal and adult human brain. We integrated multiple routinely used differentiation schemes to acquire a thorough understanding of human PSC-derived interneuron variability. Together, our work yields an integrated view of the transcriptional programs that distinguish individual subtypes of interneurons across different stages of development and defines programs specific to the mature state.

## RESULTS

### ASCL1 and DLX2 overexpression generates PSC-derived GABAergic interneurons comparable with conventional differentiation methods

One method that was described to robustly generate interneurons from human PSCs is the overexpression of two

transcription factors (TFs) that were previously shown to be important for interneuron fate in a variety of settings (Yang et al., 2017). To characterize the diversity of interneurons induced from human PSCs by TF-induced programming, we infected the H9 human embryonic stem cell (ESC) line with individual lentivirus particles containing the coding sequence of the TFs *ASCL1* and *DLX2*, respectively (referred to here as the AD method), under the control of the tet-inducible promoter (Figure 1A). Infected cells were maintained in DOX/mTesr culture medium for 24 h before being switched to DOX/neuronal medium. After 6 days of treatment with puromycin and hygromycin to select for cells integrated with *ASCL1* and *DLX1* lentiviral backbone, induced interneurons (iINs) were dissociated and seeded onto mouse glial cultures, which are known to promote the viability of human neurons (Ahmed et al., 1983; Conde Guerri et al., 1989; Sugiyama et al., 1989). DOX was maintained for a further 7 days and subsequently removed (Figure 1A).

After 2 weeks of DOX removal, we characterized iINs to ensure proper specification of the GABAergic interneuron fate. We used an antibody against human nuclear antigen (HuNu) to identify human neurons against the co-cultured glial mouse cells. iIN cultures showed strong expression of the pan-neuronal marker TUJ1 and of the interneuron-specific neurotransmitter gamma-aminobutyric acid (GABA) (Figure 1B). qPCR for *OCT4*, a marker of PSCs, and for TFs involved in the development of GABAergic interneurons, including *LHX6*, *MAFB*, *DLX5*, *SOX11*, *FOXG1*, and *NKX2-1*, as well as for *ERBB4*, a marker specific for migrating interneurons (Fregnan et al., 2014; Rakic et al., 2015; Villar-Cervino et al., 2015), confirmed appropriate gene expression profiles for interneuron specification (Figure 1C).

Next, to validate the functional specification of these iINs, we performed electrophysiological recordings from five batches of cultured cells. We recorded from 29

### Figure 1. Defining diversity of interneurons generated via TF-induced programming of human PSCs

- (A) Schematic of the *ASCL1*/*DLX2* expression constructs and procedure used to generate interneurons (iINs) with the AD method.  
(B) Immunostaining of iINs after 2 weeks for HuNu, TUJ1, and GABA.  
(C) qPCR for pluripotency- and interneuron-specific transcripts in iINs. Error bars are representative of three technical repeats.  
(D) Representative patch clamp analysis of two iINs 2 weeks after induction, measuring action potential frequency. Membrane voltage traces (top) show the effects of depolarizing (black) and hyperpolarizing (red) current injections. The traces of the injected currents (duration 200 ms) are shown in bottom panels. Note the different modes of firing in the two cells: (left) repetitive firing and (right) only one action potential fired upon depolarization and a rebound action potential following the hyperpolarizing pulse.  
(E) Quality analysis of scRNA-seq data for the two biological replicates of iINs at 2 weeks of induction (after dox withdrawal), measuring the number (No) of transcripts and genes, and percentage of mitochondrial reads per cell across.  
(F) UMAP clustering of single iINs for the two repeats in (E).  
(G) Quality control showing even distribution of cells from both replicates among the eight clusters from (F).  
(H) Normalized expression levels of indicated genes superimposed onto the UMAPs from each replicate. Colored according to expression levels by cell.  
(I) As in (H), except for the interneuron subtype marker, *SST*.  
(J) As in (I), except for cells that express both *SST* and *CALB2* (left, in blue) or *SST* and *NPY* (right, in red).

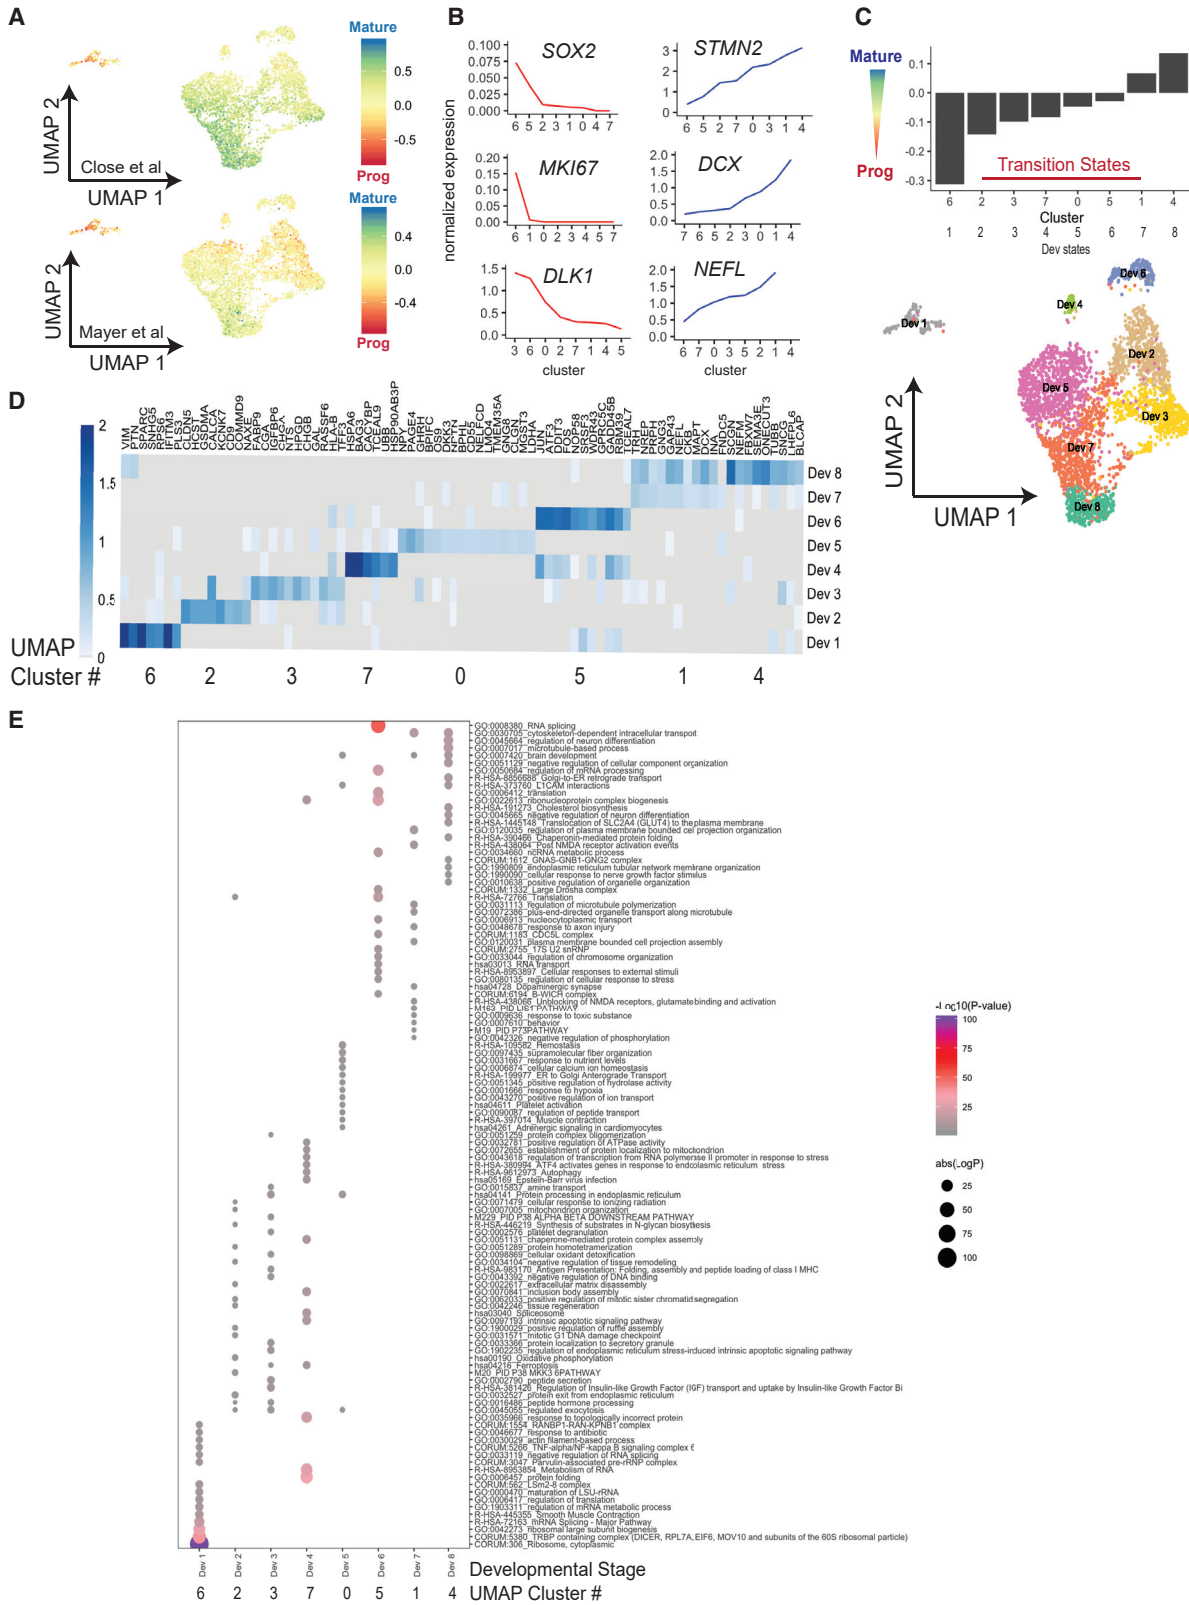

(legend on next page)





fluorescently labeled iINs; 48% of them showed either multiple action potential firing (Figure 1D, left) or single action potential firing upon depolarizing current injections (Figure 1D, right) at their resting membrane potential. These results were not surprising given the requirement for many months in culture or for transplantation into the mouse brain to fully mature (Marin, 2013; Maroof et al., 2013).

To characterize heterogeneity of iINs, we performed droplet-based RNA sequencing (Drop-seq) (Macosko et al., 2015) of single iINs at 2 weeks of induction (post-DOX withdrawal). Cells were filtered to remove mouse cells, cells with low-quality reads (<500 genes and mitochondrial genes >10%) and cells with aberrantly high gene counts, indicative of doublets (>3,000 genes), resulting in transcriptomic data from a total of 3,363 cells across two repeats (replicate 1 [Rep 1] = 766 cells, Rep 2 = 2,597 cells) (Figure 1E), with a mean of 780 genes detected per cell. The Uniform Manifold Approximation and Projection (UMAP)-based embedding shows that iINs could be split into eight distinct clusters (Figure 1F), with similar distributions from both replicates (Figure 1G). The cells robustly expressed the general neuronal markers *STMN2* and *SOX11*, as well as the interneuron-specific markers *GAD1* and *GAD2*, and lacked expression of the excitatory marker *SLC17A7*, confirming interneuron specification (Figure 1H). Exploring the expression of broad interneuron subtype markers, we found that the vast majority of iINs expressed *SST*, reminiscent of interneurons from the medial ganglionic eminence (MGE) (Anderson et al., 2001; Fishell, 2007; Marin et al., 2000) (Figure 1I). Smaller sub-populations co-expressed *SST/CALB2* and *SST/NPY* (Figure 1J); however, we did not find evidence of *PVALB*-expressing cells, which are not born in the brain until much later in development and are difficult to generate from human PSCs (Maroof et al., 2013). Furthermore, very few cells expressed caudal ganglionic eminence (CGE) subtype markers, including *CALB2*

(without *SST*), *RELN* and *VIP* (not shown). Thus, the expression of *ASCL1/DLX2* generated a high proportion of GABAergic interneurons with a bias toward *SST+* cells (Figure 1J).

### Comparison of iINs induced from PSCs by different methods

We next investigated the relative maturity of the iINs generated by forced expression of *ASCL1* and *DLX2* in PSCs. We assigned all cells a score based on both neural progenitor and maturing interneuron gene sets described by two separate scRNA-seq datasets on maturing interneurons generated from PSCs in defined interneuron induction culture medium or on *in vivo* murine development (Close et al., 2017; Mayer et al., 2018; Schuman et al., 2019; Wamsley and Fishell, 2017) (Figure 2A). Using the Close et al. signatures from PSC-derived iINs (Figure 2A), we found progenitor-like cells in cluster 6 and the most mature cells in cluster 4 (clusters as described in Figure 1F), indicating that the overexpression of AD can generate similar maturation states, but in only 2 to 4 weeks as opposed to 7 weeks necessary for typical directed differentiation toward interneurons. Accordingly, transcripts for progenitor markers such as *SOX2*, *MKI67*, and *DLK1* were enriched in cluster 6, whereas migration and axonal markers *DCX*, *STMN2*, and *NEFL* were most expressed in cluster 4 (Figure 2B). Using the maturity scores derived from the *in vivo* gene sets from Mayer et al. (2018) (Figure 2A), a similar distribution was apparent. However, the most mature cluster 4 did not reach full maturation and most iINs showed a strong progenitor score, aligning with previous reports that human PSC-derived interneurons do not fully mature *in vitro*.

Using the expression status of progenitor and maturation genes, we generated a trajectory and inferred a developmental state for each of the eight clusters of AD-induced iINs (Figure 2C) and defined gene expression signatures for each developmental state (Dev1–8), from

### Figure 2. Characterization of specification and maturation of iINs

(A) UMAP of scRNA-seq data from iINs (as defined in Figure 1F) colored according to maturity score, from red, immature progenitors, to blue, mature neurons, based on the maturation signatures for *in vitro* differentiation (Close et al., 2017) and for *in vivo* data (Mayer et al., 2018). Scores were computed by averaging each cell's normalized expression of maturation genes and subtracting from the average of the normalized expression of progenitor genes.

(B) Normalized transcript levels of progenitor (*SOX2*, *MKI67*, *DLK1*) and neuron (*STMN2*, *DCX*, *NEFL*) marker genes across each of the eight iIN clusters from Figure 1F. Clusters are organized by increasing expression levels.

(C) Bar plot showing the average maturation score from (A) across clusters 0–7 from Figure 1F, ordered from most progenitor-like to most mature. Based on the increasing maturation signature axis, clusters 0–7 were redefined as developmental transition states (Dev1–8).

(D) Top 20 differentially expressed genes (above a threshold of 1 for average log<sub>2</sub> fold change) between the iIN clusters, ordered by developmental group.

(E) GO analysis of all differentially expressed genes above a threshold of 0.5 average log<sub>2</sub> fold change for each cluster, ordered by Dev state. The original cluster number is given below. Dots are colored according to each GO term's p value, and the size of dots represent the number of genes identified within each GO term.

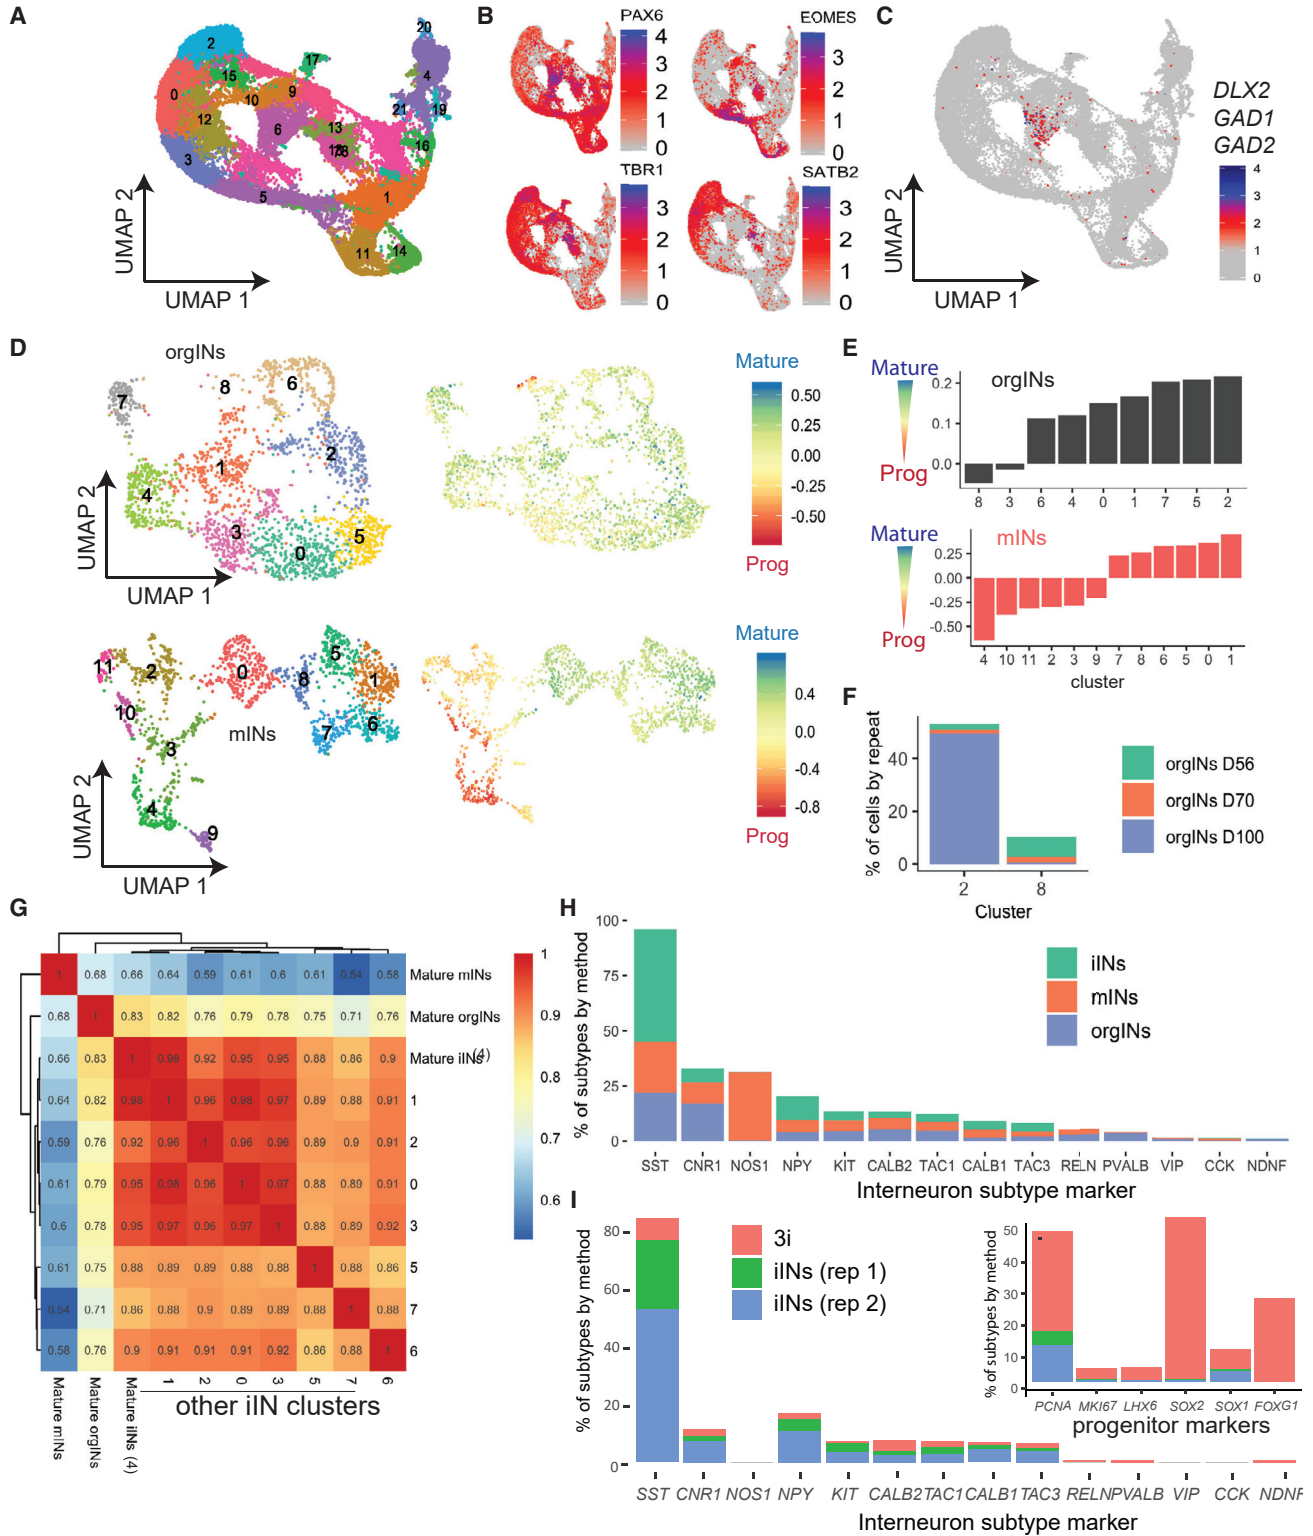

**Figure 3. Comparison of iINs, mINs, and orgINs**

(A) Unsupervised UMAP clustering of 36,076 single cells derived from day 56 (D56) unfused, day 70 (D70) and day 100 (D100) fused cortex and MGE organoids.

(legend continued on next page)



progenitor, neuron-specified, to postmitotic iINs (Figure 2D). The most primitive developmental stage (Dev1, cluster 6) showed a strong enrichment for the splicing and regulation of mRNA, which has been previously described as an enriched feature of developing tissues, including the CNS (Figure 2E) (Lopez, 1998; Voineagu et al., 2011; Wamsley et al., 2018). The Dev 2–4 states demonstrated a shift in the metabolism of cells to oxidative phosphorylation, and activation of the p38-MAPK pathway and insulin growth factor (IGF) signaling (Figure 2E). The p38-MAPK pathway has been associated with cell-cycle arrest and may signify the exit of the cell cycle typical of progenitors becoming neurons (Brancho et al., 2003). The Dev 5 state captured a third transition and associated genes are linked to peptide and ion transport and calcium homeostasis, important features for the stabilization of neuronal membrane potential (Figure 2E). Genes characterizing the final Dev 6–8 states yielded terms related to microtubule polymerization, synaptic regulation, brain development, and cholesterol biosynthesis. Taken together, the forced expression of *ASCL1* and *DLX2* generated GABAergic iIN populations as previously reported; however, the single-cell analysis provided here highlighted developmental heterogeneity within these cultures.

### Heterogeneity and maturity of interneurons created in organoid cultures

To better understand how the use of TF-induced programming of iINs compares with conventional directed differentiation methods for GABAergic interneuron generation, we took advantage of the same scRNA-seq dataset from monolayer differentiation exploited in Figure 2 (Close et al., 2017) (monolayer interneurons [mINs]) and a scRNA-seq dataset generated from unfused or fused MGE-cortex organoids after 56, 70, and 100 (days of induction from PSCs (organoid interneurons [orgINs]) (Samarasinghe et al., 2021). We detected 22 clusters in the organoid dataset

(Figure 3A), including clusters of basal radial glia (marked by *PAX6* transcripts), intermediate progenitors (*EOMES*), deep cortical plate (*TBR1*), superficial cortical layers (*SATB2*), and interneurons (*DLX2*, *GAD1*, and *GAD2*, cluster 6) (Figures 3B and 3C). Re-clustering of the interneuron cluster generated nine interneuron-specific clusters (Figure 3D). From the mIN dataset, interneurons separated into 12 distinct clusters (Figure 3D).

Next, we attempted to understand whether the mINs and orgINs showed a similar type of progressive developmental trajectory as found for iINs. Using the gene signatures from Figure 2A, we found that, while there was a wide spectrum of developmental states in the mIN culture, this was not the case for orgINs (Figures 3D and 3E). Aside from a small number of cells with a strong progenitor-like signature (cluster 8), orgINs produced mostly interneurons that appear to be most similar to a postmitotic, fully specified fate (Figures 3D and 3E). In orgINs, clusters 8 and 2 were the most progenitor- and mature-like, respectively (Figure 3E). Cells from day 56 predominated in cluster 8, whereas cells from day 100 predominated in cluster 2, indicating a maturation with different time course and/or organoid fusion (Figure 3F) (Samarasinghe et al., 2021).

Compared with orgINs, mINs showed a more progressive developmental transition with a slower drop in progenitor marker levels and less dramatic acquisition of mature markers (Figures 3D and 3E). This observation was more similar to that for iINs (AD method), indicating that the 3D structure and network generation of multiple cell types within organoids results in a more uniform maturation of interneurons than monolayer-based methods. On the other hand, this distinction could also be a product of the fact that the interneurons profiled from the organoids were profiled after 7–14 weeks, while the iINs were profiled after just 2–3 weeks. However, neither *in vitro* method generated significant numbers of fully mature interneurons as defined by the maturation signature (defined by data from the Close and Fishell maturation signatures,

(B) UMAP from (A) colored by the normalized expression of indicated genes in individual cells.

(C) As in (B), except that the plot shows the co-expression of indicated interneuron marker genes, indicating that cluster 6 is expressing these markers together.

(D) (Top) Cells from interneuron cluster 6 of the organoid scRNA-seq data in (A) (orgINs) were divided into nine interneuron clusters (0–8) and plotted on a UMAP (left). In the same UMAP to the right, individual cells are colored by the maturation score from Close et al. (2017). (Bottom) UMAP of the scRNA-seq data from the mIN dataset of 2D cultures of interneurons made by directed differentiation (Close et al., 2017), separating interneurons into 12 distinct clusters (0–11) (left) and colored by the maturation score from (Close et al., 2017) (right).

(E) Maturation score for the clusters in (D), ordered from least to most mature.

(F) The contribution of cells from different organoid harvest time points to the orgINs clusters with highest (cluster 2) and lowest (cluster 8) maturation state.

(G) Pearson correlation analysis for the most mature orgIN cluster (cluster 2 from (E)), the most mature mIN cluster (cluster 1 from (E)), and all iIN clusters (AD-method-derived interneurons) from Figures 1 and 2 (with cluster 4 containing the most mature cells).

(H) A survey of the subtypes of interneurons found in iINs, mINs, and orgINs.

(I) A similar analysis as in (H), but for individual experiments for directed differentiation (3i) of human induced PSCs or the two biological replicates of iINs from hESCs.

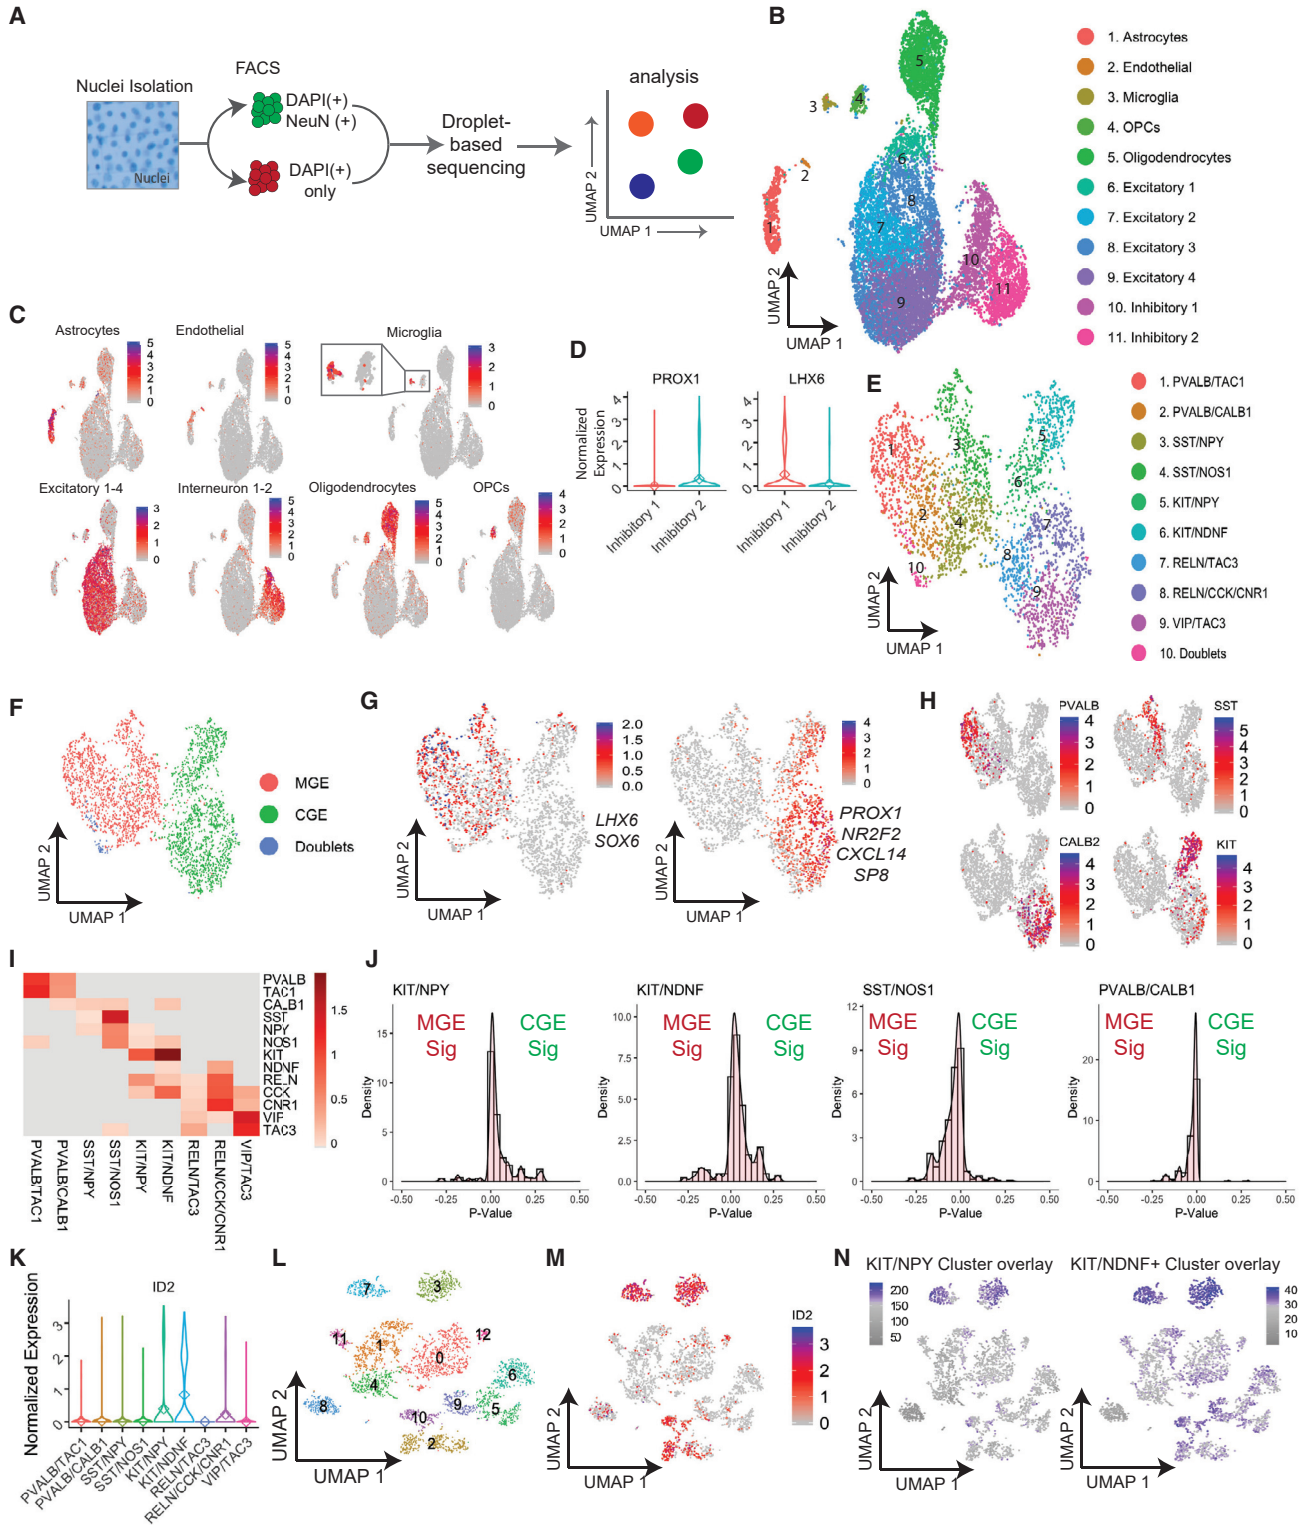

**Figure 4. Profiling interneurons from human adult brains with snRNA-seq**

(A) Schematic of the workflow for snRNA-seq from frozen archived adult brain cortex.

(B) UMAP of 17,879 nuclei from six adult cortices. Cell identities were assigned to clusters based on marker gene expression.

(C) Simultaneous expression of several genes known to define clusters in (B).

(legend continued on next page)



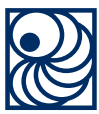

signified by blue color) (Figure 3D). To further compare these *in vitro* methods of interneuron generation, we correlated the most fully specified clusters of interneurons from mINs and orgINs with all iIN clusters and found highest similarity to the most mature iIN cluster 4 (Figure 3G), followed by cluster 1, which was the only other more mature cluster of iINs (Figure 2C).

We also explored whether each of the different methods generated different proportions of interneuron subtypes (Figure 3H). Using established markers (Darmanis et al., 2015; Habib et al., 2017), we found that the majority of interneurons from all *in vitro* methods were SST+, arguing that the modeling of SST-related disorders would be most informative *in vitro*. Smaller proportions of interneurons defined by expression of *KIT*, *CALB2*, *TAC1*, *CALB1*, and *TAC3* were generated in all the methods (Figure 3H). orgINs were not substantially more diverse than monolayer-based methods, but contained a small number of *PVALB+* interneurons (Figure 3H). To determine whether each individual human PSC line or each derivation showed consistent results, we also plotted cell type proportions from the replicates of AD-enforced cultures and our own directed differentiation cultures (without TF overexpression, 3i; Maroof et al., 2013) generated from distinct human PSC lines, and came to similar conclusions (Figure 3I). However, iIN cultures contained fewer progenitors than interneuron cultures generated by directed differentiation (Figure 3I, inset).

### Identifying hallmarks of maturation in interneurons in the adult human brain

We next set out to compare the PSC-derived interneurons generated by the AD-method with *bona fide* interneurons from the human brain. We took advantage of methods to analyze RNA from individual nuclei of frozen

*post mortem* human frontal cortex, a reliable method to generate informative transcriptomes from frozen samples (Habib et al., 2017). To improve RNA capture, we slightly modified the Drop-seq approach for scRNA-seq, whereby droplet size was decreased and lysis buffer concentration increased to improve nuclear membrane lysis (Habib et al., 2017). We isolated and fluorescence-activated cell sorted individual nuclei based on DAPI staining from six healthy adult frontal cortex tissue samples. From the same donors, we also sorted nuclei based on DAPI and NeuN staining to enrich neuronal cells, as interneurons represent only a small proportion of total cells within the adult brain (Figure 4A). We merged the data from all six brains and, using UMAP-based clustering, identified 11 clusters that corresponded to previously established cell types, including astrocytes, endothelial cells, microglia, oligodendrocyte precursor cells (OPCs), oligodendrocytes, and excitatory and inhibitory neurons, identified using established markers of each cell type respectively (Figures 4B and 4C). Within the clusters that showed markers of inhibitory neurons, cells were broadly split into two groups of distinct developmental origin, such that inhibitory interneuron cluster 1 highly expresses *LHX6*, indicative of MGE-derived interneurons, whereas inhibitory interneuron cluster 2 expresses *PROX1*, indicative of CGE-derived interneurons (Figure 4D).

To ascertain whether we captured the interneuron diversity of the adult brain in our *in vivo* dataset, we re-clustered the inhibitory clusters 1 and 2, yielding 10 clusters broadly separable according to developmental origin, including clusters enriched for either MGE markers *LHX6* and *SOX6*, or CGE markers, *PROX1*, *NR2F2*, *SP8*, and *CXCL14* (Figures 4E–4G). One cluster was consistent with doublets of cells, and was not considered in subsequent analyses.

(D) Violin plots for the normalized expression of *PROX1* and *LHX6* in the two interneuron clusters 10 and 11 in (B), called Inhibitory 1 and 2, to decipher MGE- versus CGE-derived interneurons.

(E) The UMAP of the cells from interneurons from clusters 10/11 in (B), revealing 10 interneuron sub-clusters (1–10) of the adult brain, labeled based on key marker expression.

(F) UMAP from (E) split into MGE- versus CGE-derived interneurons based on simultaneous expression of region-specific markers.

(G) UMAP as in (E) showing the simultaneous expression of established markers of either MGE (*LHX6*, *SOX6*) or CGE (*PROX1*, *NRF2*, *CXCL14*, *SP8*).

(H) Normalized expression of indicated interneuron subtype marker on the UMAP from (E).

(I) Heatmap of normalized expression of selected interneuron markers by clusters from (E).

(J) Histograms to demonstrate the developmental origin of indicated *KIT+* clusters and *SST/NOS1*, *PVALB/CALB1* clusters as controls. MGE and CGE gene signatures were generated by taking the top 20 most differentially expressed genes between MGE- and CGE-derived interneurons. Individual cells were assigned MGE and CGE scores based on their individual expression of each MGE or CGE gene, using the Wilcoxon test.

(K) Normalized expression for *ID2* in interneuron sub-clusters from in (E).

(L) UMAP of all interneuron subtypes in a human brain dataset from the Allen Brain Database.

(M) As in (L), with an overlay of the normalized expression of *ID2*.

(N) Simultaneous expression of *KIT/NPY* and *KIT/NDNF* cluster signature genes (genes unique to *KIT/NPY* or *KIT/NDNF* clusters from E with an average log<sub>2</sub> fold-change cutoff of 0.5), overlaid on the UMAP in (L).

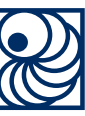

To assign subtypes, we cross-validated the gene expression of the remaining nine interneuron clusters against a published dataset of single-cell profiling of human cortex (Habib et al., 2017) and were able to assign the four overarching interneuron types *PVALB*, *SST*, *CALB2*, and *KIT* (Figures 4H and 4I).

Interestingly, *KIT*<sup>+</sup> inhibitory neurons were recently described in mouse cortex (Fishell, 2007; Mayer et al., 2018; Wamsley and Fishell, 2017). Therefore, our data suggest that they also exist in the adult human brain. To determine the developmental origin the *KIT*<sup>+</sup> interneuron subsets, we looked for expression of gene signatures representative of MGE- and CGE-derived cells (Figure 4J), and found that both *KIT*<sup>+</sup> populations appeared to be closer to CGE, as opposed to *SST* or *PVALB* populations, which looked more similar to MGE. Both our *KIT*<sup>+</sup> clusters also showed strong expression of *ID2*, characteristic of a subtype recently described in the mouse and human cortex (<https://portal.brain-map.org/atlas-and-data/rnaseq>) (Figure 4K). An overlay of the enriched genes from the *KIT/NPY* and *KIT/NDNF* clusters onto the Allen Brain Database of single-nuclei RNA sequencing (snRNA-seq) data from the human cortex (Figures 4L–4N) showed a very strong similarity with two of the *ID2*<sup>+</sup> clusters in the Allen dataset (Figure 4N), confirming the presence of these cells in our independent dataset. These data indicate that our method to derive and characterize interneurons from adult brain encompassed most known subtypes of interneurons.

### Comparing iINs with interneurons during human gestation

To further determine genes that define the adult state of human interneurons *in vivo*, we reasoned that the comparison with an earlier developmental state would also be informative, and integrated our Drop-seq-generated single-cell transcriptomes from interneurons in fetal development (Polioudakis et al., 2019). We used profiles of 10,101 cells from two samples at 15 postconceptional weeks (pcw), which formed 17 clusters upon dimensionality reduction (Figure 5A). Analyzing the expression signatures of these clusters, we identified similar groups of cell types as in the adult human brain, including OPCs, endothelial cells, excitatory and inhibitory neurons, as well as cell types not present in our adult brain dataset, namely, radial glia and pericytes (Figure 5B). Within the radial glia, we found clusters that were separated based on cell proliferation and cell identity, with clusters 2 and 3 showing an enrichment for proliferation markers (*MKI67* and *TOP2A*) and cluster 6 for oRG markers (*HOPX*, *PTPRZ1*, *FAM107A*, and *TNC*) (Figures 5A–5D), which are known to contribute to new cell formation in upper layers specifically in the developing human brain.

Probing for inhibitory neuron markers within the fetal dataset, we defined three interneuron clusters, as shown

through the expression of *DLX2*, that, similarly to the adult dataset, separated based on developmental origin of MGE (*SST*<sup>+</sup> interneurons) versus CGE (*CALB2*<sup>+</sup> interneurons) (Figure 5E). Interneuron cluster 17 showed a strong enrichment for *TAC3*, a marker often found expressed alongside *PVALB* in mature interneurons (Figure 5E). This cluster may represent interneurons destined to become *PVALB*<sup>+</sup> later in development as previously suggested (Polioudakis et al., 2019). Re-clustering of the interneurons did not reveal any further separation of the broad subtypes (not shown). We also found that few fetal interneurons expressed the diverse subtype markers that we found within the adult brain, with *SST* and *CALB2* being the predominant markers, identical to our findings of *in vitro*-derived interneurons (Figure 5F) but distinct from adult brain data (Figure 4). These observations demonstrate that, in this developmental time frame, interneurons have a vastly reduced heterogeneity compared with the adult brain, leading to the conclusion that the acquisition of subtype diversity correlates with interneuron maturation.

### Identifying expression patterns that distinguish *in vitro*- from *in vivo*-derived interneurons

Next, we were interested in understanding the dynamic expression patterns of genes across our *in vitro*-derived (iINs, mINs, and orgINs) and *in vivo*-generated datasets for the fetal and adult brain. Due to the power of sc/snRNA-seq, we were able to perform these analyses in a subtype-specific manner, which is of importance due to the different functional behaviors of interneuron subtypes. First, we merged *SST*<sup>+</sup> interneurons from our *in vitro* iINs, mINs, and orgINs datasets and compared them with fetal and adult *SST*<sup>+</sup> interneurons through differential gene expression analysis. Using Gene Ontology (GO) analysis to understand the biological context of gene expression changes, we found that each set of *SST*<sup>+</sup> interneurons exhibited unique signatures, such that adult interneurons enriched for synaptic terms, learning, memory, and neurotransmission, fetal interneurons for chromatin organization, forebrain development, and neuron differentiation, and *in vitro*-derived cells for metabolism and protein translation (Figures 6A and 6B).

We next turned our attention more specifically to differentially expressed TFs to gain an insight into the regulation of differences in cell states between in *SST*<sup>+</sup> interneurons, as these are known to be critical to specify and maintain cell fate. We built networks of co-expressed TFs and chromatin regulators across the developmental stages through a correlation analysis and divided them into eight modules (Figure 6C). Some of these modules were expressed specifically in either the adult, fetal, or *in vitro* interneurons, whereas other modules were common to all three samples (Figure 6C). This also implied that fetal *SST* interneurons at

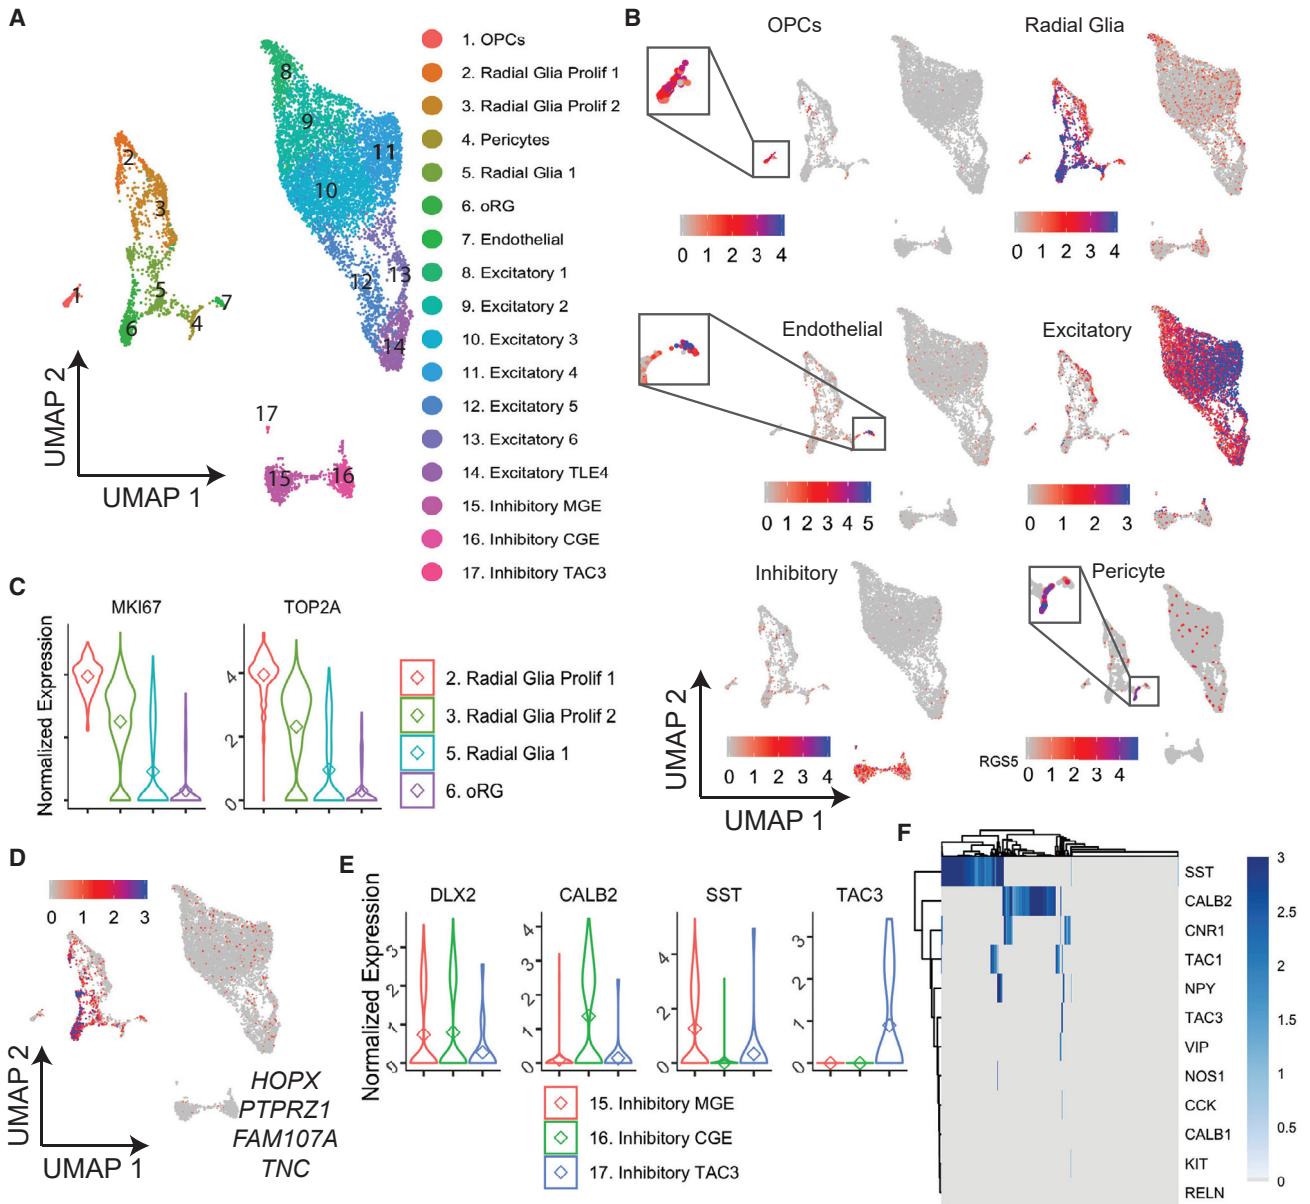

**Figure 5. Single-cell profiling of fetal brain interneurons**

(A) Unsupervised clustering using UMAP analysis of 11,796 cells from fetal cortex (Polioudakis et al., 2019).

(B) UMAP as in (A) colored by the simultaneous expression of marker gene panels previously established as unique to broad CNS cell types in the fetal brain (Polioudakis et al., 2019). For pericytes, the normalized expression level of the pericyte marker *RGS5* is given.

(C) Violin plots of normalized expression counts in single cells from all radial glial clusters from (A), for genes associated with cell proliferation.

(D) UMAP as in (A) overlaid to show the simultaneous expression indicated for outer radial glia markers.

(E) Violin plots of normalized expression counts for indicated interneuron-specific markers, in single cells of interneuron clusters in (A).

(F) Heatmap of the normalized expression of indicated interneuron subtype markers with optimal leaf hierarchical ordering.

15 pcw were developmentally progressed compared with their *in vitro* counterpart.

Many of the TFs within the modules are known to play important roles during neurogenesis and are typically

found early during development (Figure 6D). For instance, module 7 captured TFs most enriched in PSC-derived cells, including *MEIS3*, *PAX6*, *HES6*, *HOPX*, and *POU2F2*. Within module 5, we identified TFs that showed strongest

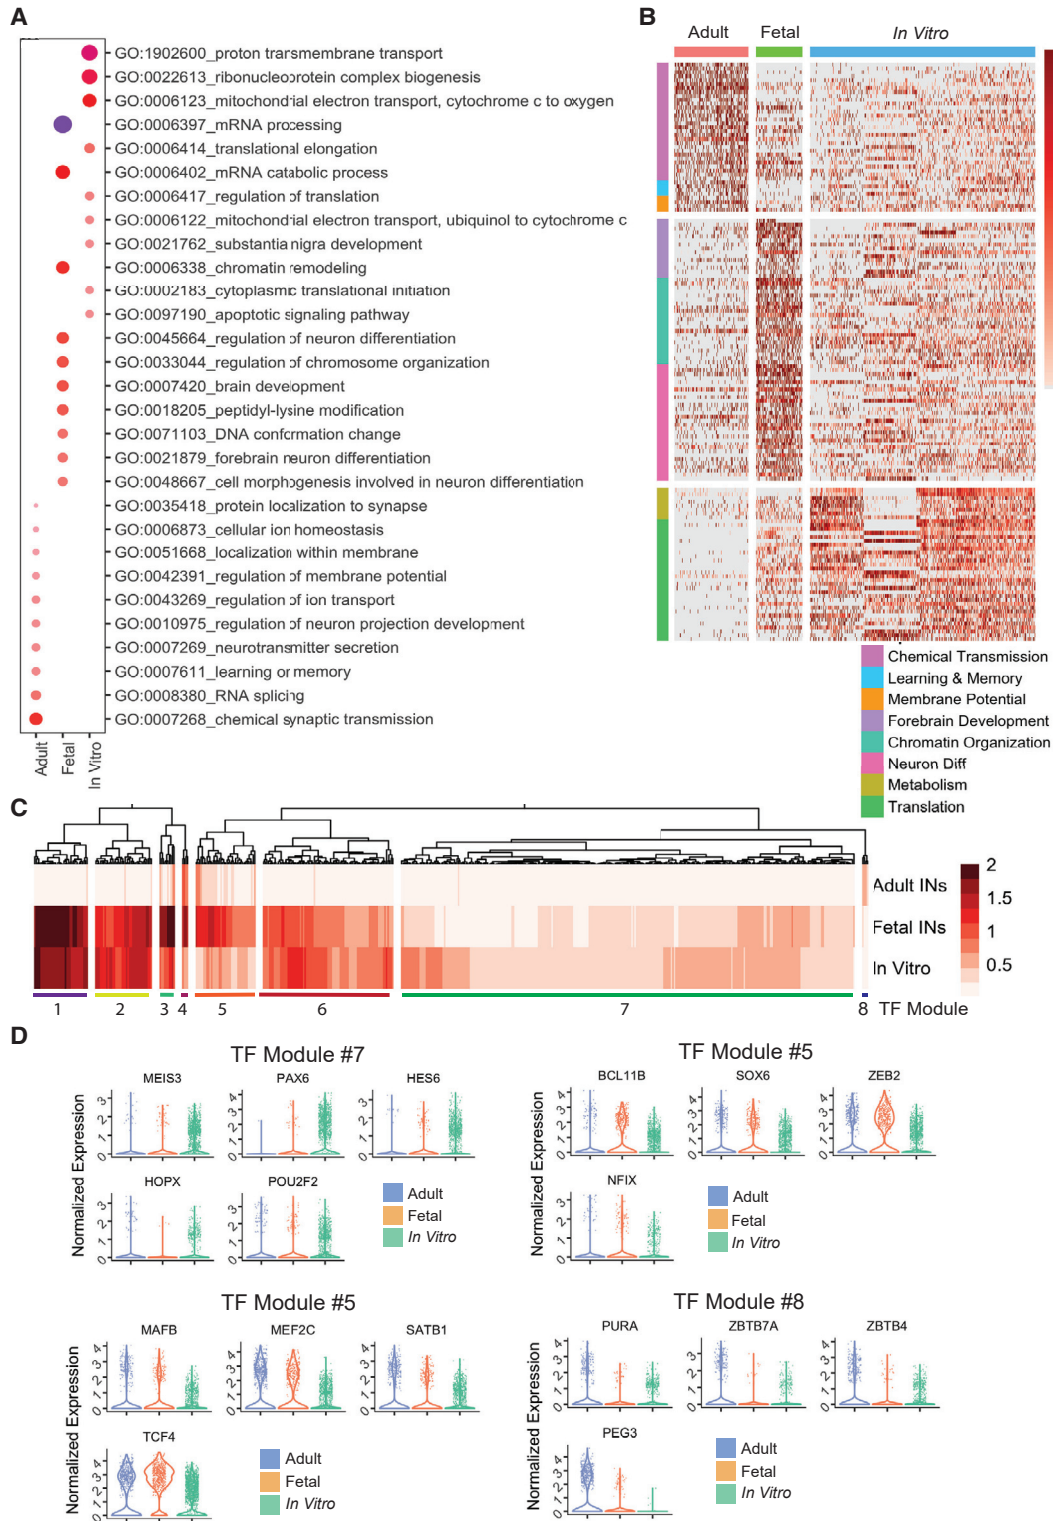

**Figure 6. Defining transcriptional modules that distinguish SST+ interneurons born *in vitro* versus *in vivo***

(A) GO analysis of differentially expressed genes (unique genes with an average log<sub>2</sub> fold change above 0.5) across SST+ interneurons from adult, fetal, and *in vitro* samples. *In vitro* samples consist of SST+ interneurons from iINs, mINs, and orgINs. Dot color represents the log<sub>10</sub> p value for each term and the size represents the number of genes present per GO term.

(legend continued on next page)





enrichment in fetal interneurons. These TFs were typical of developing interneurons, including *BCL11B*, *SOX6*, *ZEB2*, and *NFIX*. Within this same module, we also found the enrichment of some MGE-specific TFs in both fetal and adult cells, including *MAFB*, *MEF2C*, *SATB1*, and *TCF4*. Finally, in module 8, we found TFs specific to adult cells, including *PURA*, *ZBTB7A*, *ZBTB4*, and *PEG3*. Both *ZBTB4* and *ZBTB7A* regulate chromatin organization, and mutations in other types of genes with roles in regulation of gene expression in this module are often found in ID syndromes, such as Angelman syndrome (*UBE3A*) (Kishino et al., 1997; Matsuura et al., 1997) and ICF syndrome (*DNMT3B*) (Huang et al., 2014; Moarefi and Chedin, 2011; Sagie et al., 2014).

Using the same form of analysis, we interrogated how interneurons that expressed *CALB2* changed over development and between *in vivo* and *in vitro* conditions. Surprisingly, we found that PSC-derived, fetal, and adult *CALB2+* interneurons showed highly similar changes to *SST* interneurons from the same states. Consequently, we found similar GO terms and a large overlap for differentially expressed genes for *SST* and *CALB2* interneuron states (Figures 7A and 7B). Pearson correlation analysis again highlighted eight clusters of co-expressed TFs that distinguish *in vitro* *CALB+* interneurons from fetal and adult *CALB+* interneurons (Figure 7C). We also found that many of the TFs that define *in vitro*, fetal, and adult *SST+* interneurons were also enriched in *CALB2+* interneurons from the respective stage (Figure 7D). It was apparent that the differences between *SST+* and *CALB2+* interneurons from both the adult and fetal samples were characterized by TFs that are known to play a role in subtype specification, including the MGE-specific TFs (*SATB1*, *MAF*, *LHX6*) for *SST+* interneurons and the CGE-specific TFs (*NFIX*, *NR2F2*, and *PROX1*) for *CALB2+* interneurons (Figure 7D). We conclude, therefore, that the process of maturation is conserved between subtypes, leading to the notion that the functional differences observed between subtypes may be established early in development.

## DISCUSSION

Interneurons made from human PSCs could be useful to ameliorate patient symptoms not only because of their importance in a variety of diseases, such as epilepsy, but also because they can be derived easily and appear to

survive in transplantation models. However, our work highlights the molecular and physiological immaturity of interneurons derived from human PSCs relative to both mid-gestation and adult INs. We elaborated on molecular distinctions between particular subtypes of interneurons as they proceed through maturation as a resource to both understand their development and also provide clues as to how to promote their maturity. We provided a single-cell characterization and comparison of various subtypes of interneurons derived *in vitro* and *in vivo*. It is not clear at this point whether excitatory neurons employ the same types of molecular tools to advance their maturation as do interneurons, but they are known to do so at a much faster rate. As a result, similar studies will need to be carried out to identify equivalent patterns of gene expression that drive maturation in the excitatory lineages.

The *in vitro* work described here demonstrates several advantages and disadvantages of distinct culture methods. First, all three methods described here only generated a limited diversity of subtypes of interneurons. iINs were highly homogeneous and were generated quickly, while directed differentiation via culture conditions was slow. orgINs were more diverse than the other methods, but took significant effort and time to produce. None of these methods produced mature, post-natal-like interneurons as defined functionally (electrophysiology) or transcriptionally. Future work will focus on forced expression of additional TFs that could drive maturation beyond that observed with *ASCL1* and *DLX1*.

This work also sheds light on the processes by which different subtypes of neurons achieve maturation. *A priori*, it was possible that each subtype of interneuron takes advantage of distinct mechanisms to drive maturation. Our data suggest that *in vitro*-derived *SST+* and *CALB2+* interneurons each show similar patterns of expression that distinguish them from their brain-derived counterparts. This is not to say that the genes that distinguished the *in vitro* and brain-derived interneurons were identical, but instead that the functional categories of genes, including TFs, were highly similar. This suggests that different subtypes of interneurons use the same physiological processes to achieve maturation. Going forward, we expect that studies such as this will lead to improved methods for generating mature interneurons for *in vitro* modeling of various neurological disorders that are linked in this lineage.

(B) Heatmap of normalized counts in individual cells of the top differentially expressed genes between *SST+* adult, fetal, and *in vitro* interneurons from (A), clustered according to their functional properties as defined by GO terms.

(C) TF module analysis, comparing differential expression of TFs and chromatin regulators across adult, fetal, and *in vitro*-derived *SST+* interneurons. Normalized expression data are plotted and optimal leaf hierarchical clustering was used to generate modules of highly correlating regulators.

(D) The normalized expression of indicated TFs/chromatin regulators from different modules in (C) is depicted in violin plots.

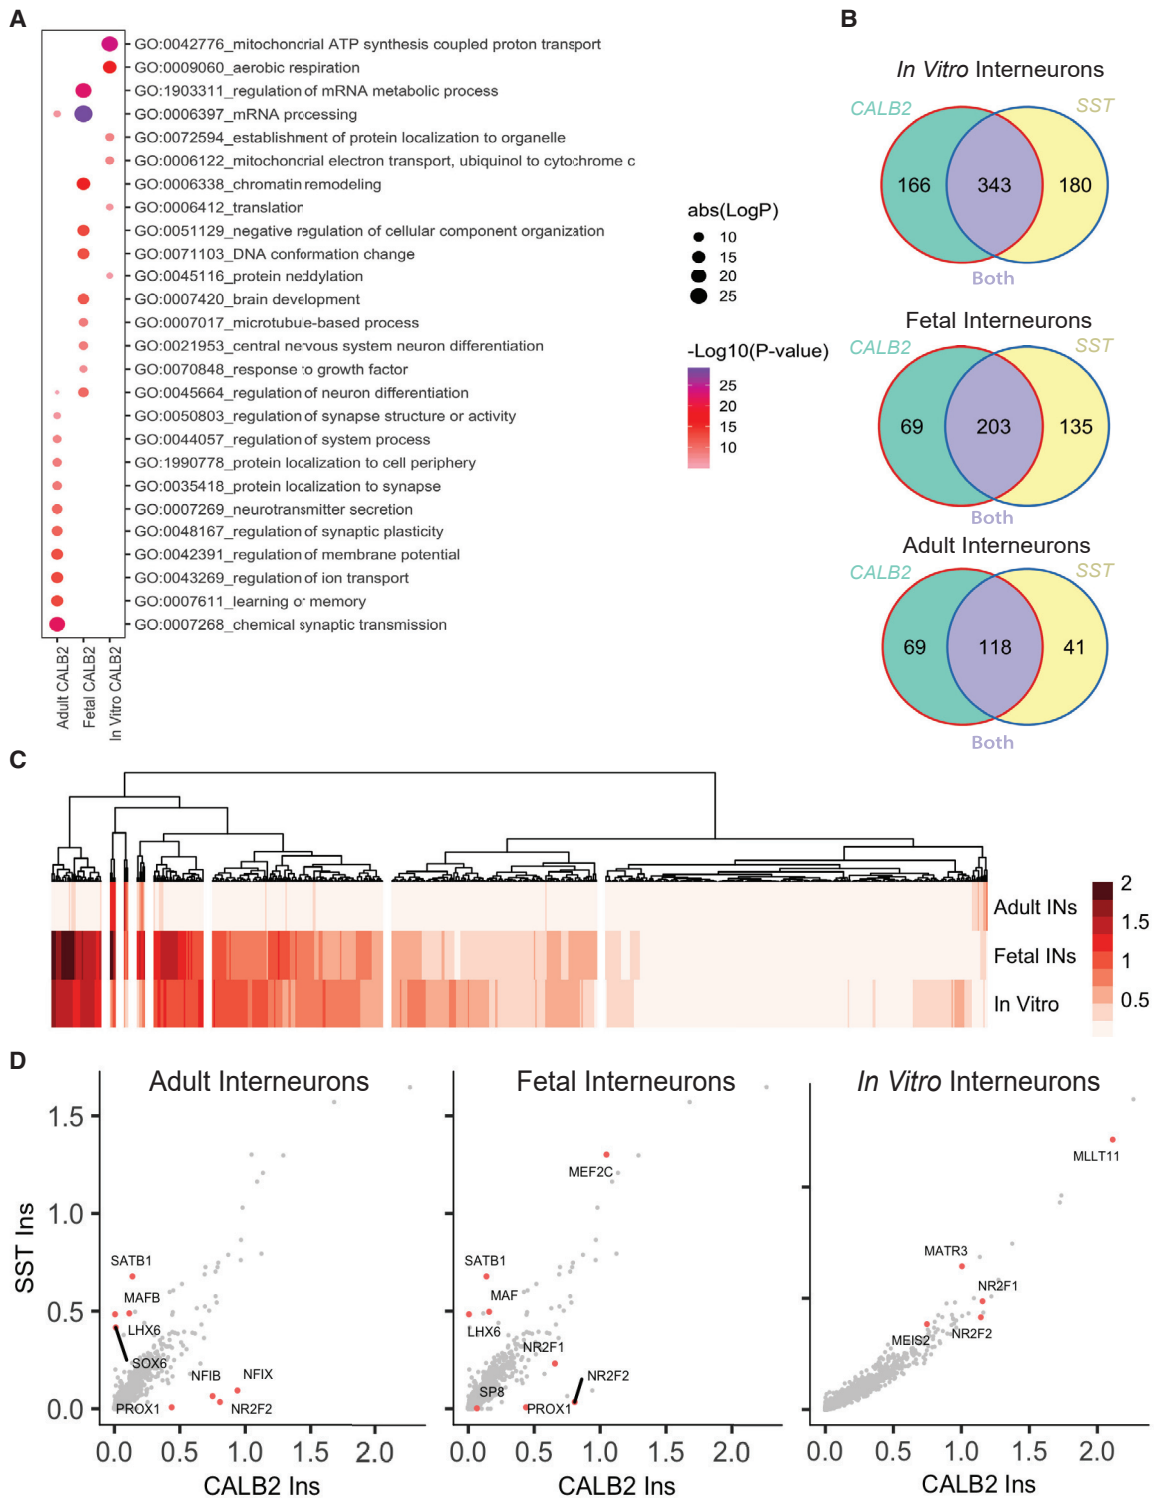

**Figure 7. *CALB2+* interneurons display maturation signatures similar to that of *SST+* interneurons**

(A) GO analysis of differentially expressed genes (average log<sub>2</sub> fold change above 0.5) across *CALB2+* interneurons from the adult, fetal, and *in vitro* samples. *In vitro* samples consist of iINs, mINs, and orgINs. Dot color represents the log<sub>10</sub> p value for each term and the size represents the number of genes present per GO term.

(B) Venn diagrams to show the overlap *in vitro*-, fetal-, or adult-specific genes in *SST+* and *CALB2+* interneurons.

(legend continued on next page)

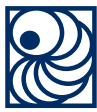

## EXPERIMENTAL PROCEDURES

### Generation of interneurons in organoid culture

The generation of brain organoids was performed as described (Samarasinghe et al., 2021).

### Tissue samples

Anonymous fetal tissue samples were obtained from the University of California, Los Angeles (UCLA), gene and cell therapy core according to institutional review board guidelines (Table S1). Anonymized discarded adult brain tissue was acquired from the NIH BioBrainBank (Table S1). NeuroBioBank (Sepulveda repository, Los Angeles, CA) for BioBrainBank. This study was performed according to the legal and institutional ethical regulations of the UCLA Office of Human Research Protection. Full informed consent was obtained from all parent donors.

Additional materials and methods can be found in the supplemental information.

### Data availability

All datasets generated or used in this study and are deposited in NIH GEO (GSE180132 and GSE181715) and are summarized in Table S1.

## SUPPLEMENTAL INFORMATION

Supplemental information can be found online at <https://doi.org/10.1016/j.stemcr.2021.08.006>.

## AUTHOR CONTRIBUTIONS

Data collection and analysis, T.A., J.L., A.L., M.O.G., D.P., X.W., I.L., J.H., and R.S.; data analysis, T.A., S.S., J.L., and D.P.; project design and support, I.C., K.P., D.G., I.M., B.N.N., and W.E.L.; manuscript preparation, T.A., K.P., W.E.L.

## CONFLICT OF INTERESTS

W.E.L. is a founder and president of Pelage Pharmaceuticals and Secretary of Sardona Therapeutics, but this work was not related to these companies. K.P. is on the Editorial Board of *Stem Cell Reports*.

## ACKNOWLEDGMENTS

We would like to thank Iris Dror for help with computational approaches, Andrew Elefanty for sharing the NKX2.1 GFP reporter hESC line, and Marius Wernig for sharing the *ASCL1* and *DLX2* plasmids. The Broad Center for Regenerative Medicine and Stem Cell Research (BSCRC) at UCLA supports core facilities used in this research and this project specifically. Several authors were supported by training grants (T.A.: BSCRC. S.S.: BSCRC Rose Hills

Foundation Training Award. J.L.: Tumor Cell Biology Training Program [US HHS Ruth L. Kirschstein Institutional National Research Service Award #T32 CA009056]. R.A.S.: UCLA/NINDS Translational Neuroscience Training Grant R25NS065723, Research and Training Fellowship from the American Epilepsy Society, Taking Flight Award from CURE Epilepsy, and the BSCRC). This work was also supported by the Paul Allen Family Foundation (W.E.L. and K.P.), and the Steffy Family Foundation (W.E.L. and B.G.N.). W.E.L. is supported by NIH NINDS (NS103788). W.E.L. was also supported by a research award from the BSCRC. K.P. is supported by the David Geffen School of Medicine at UCLA, the UCLA BSCRC, the NIH (P01 GM099134), and a Faculty Scholar grant from the Howard Hughes Medical Institute. R.A.S. is supported by NIH NINDS (K08NS119747) and the Simons Foundation. B.G.N. is supported by the NIH (R01NS089817, R01DA051897 and P50HD103557), California Institute of Regenerative Medicine (DISC1-08819), and the BSCRC and UCLA Jonsson Comprehensive Cancer Center Ablon Scholars Program. I.C. is supported by the NIH (R01AG059848).

Received: September 24, 2020

Revised: August 10, 2021

Accepted: August 11, 2021

Published: September 9, 2021

## REFERENCES

- Ahmed, Z., Walker, P.S., and Fellows, R.E. (1983). Properties of neurons from dissociated fetal rat brain in serum-free culture. *J. Neurosci.* *3*, 2448–2462.
- Anderson, S.A., Marin, O., Horn, C., Jennings, K., and Rubenstein, J.L. (2001). Distinct cortical migrations from the medial and lateral ganglionic eminences. *Development* *128*, 353–363.
- Blair, J.D., Hockemeyer, D., and Bateup, H.S. (2018). Genetically engineered human cortical spheroid models of tuberous sclerosis. *Nat. Med.* *24*, 1568–1578. <https://doi.org/10.1038/s41591-018-0139-y>.
- Boldog, E., Bakken, T.E., Hodge, R.D., Novotny, M., Aevermann, B.D., Baka, J., Borde, S., Close, J.L., Diez-Fuertes, F., Ding, S.L., et al. (2018). Transcriptomic and morphophysiological evidence for a specialized human cortical GABAergic cell type. *Nat. Neurosci.* *21*, 1185–1195. <https://doi.org/10.1038/s41593-018-0205-2>.
- Brancho, D., Tanaka, N., Jaeschke, A., Ventura, J.J., Kelkar, N., Tanaka, Y., Kyuuma, M., Takeshita, T., Flavell, R.A., and Davis, R.J. (2003). Mechanism of p38 MAP kinase activation in vivo. *Genes Dev.* *17*, 1969–1978. <https://doi.org/10.1101/gad.1107303>.
- Butt, S.J., Stacey, J.A., Teramoto, Y., and Vagnoni, C. (2017). A role for GABAergic interneuron diversity in circuit development and plasticity of the neonatal cerebral cortex. *Curr. Opin. Neurobiol.* *43*, 149–155. <https://doi.org/10.1016/j.conb.2017.03.011>.

(C) TF module analysis, comparing differential expression of TFs/chromatin regulators across adult, fetal, and *in vitro*-derived *CALB2+* interneurons. Normalized expression data were plotted and optimal leaf hierarchical clustering was used to generate modules of highly correlating TFs, and the results were similar to those found in Figure 6D.

(D) Scatterplots comparing the average normalized expression of all TFs of cells from adult (left), fetal (middle) and *in vitro*-derived (right) *CALB2+* and *SST+* interneurons.

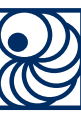

- Chao, H.T., Chen, H., Samaco, R.C., Xue, M., Chahrour, M., Yoo, J., Neul, J.L., Gong, S., Lu, H.C., Heintz, N., et al. (2010). Dysfunction in GABA signalling mediates autism-like stereotypies and Rett syndrome phenotypes. *Nature* 468, 263–269. <https://doi.org/10.1038/nature09582>.
- Chao, O.Y., Marron Fernandez de Velasco, E., Pathak, S.S., Maitra, S., Zhang, H., Duvick, L., Wickman, K., Orr, H.T., Hirai, H., and Yang, Y.M. (2020). Targeting inhibitory cerebellar circuitry to alleviate behavioral deficits in a mouse model for studying idiopathic autism. *Neuropsychopharmacology* 45, 1159–1170. <https://doi.org/10.1038/s41386-020-0656-5>.
- Close, J.L., Yao, Z., Levi, B.P., Miller, J.A., Bakken, T.E., Menon, V., Ting, J.T., Wall, A., Krostog, A.R., Thomsen, E.R., et al. (2017). Single-cell profiling of an in vitro model of human interneuron development reveals temporal dynamics of cell type production and maturation. *Neuron* 96, 949. <https://doi.org/10.1016/j.neuron.2017.10.024>.
- Cobos, I., Calcagnotto, M.E., Vilaythong, A.J., Thwin, M.T., Noebels, J.L., Baraban, S.C., and Rubenstein, J.L. (2005). Mice lacking *Dlx1* show subtype-specific loss of interneurons, reduced inhibition and epilepsy. *Nat. Neurosci.* 8, 1059–1068. <https://doi.org/10.1038/nn1499>.
- Conde Guerri, B., Sinues Porta, E., Arrazola Schlamilch, M., Comunas Gonzalez, E., and Calatayud Maldonado, V. (1989). Effects of glia-conditioned medium on primary cultures of central neurons. *Histol. Histopathol.* 4, 217–222.
- Darmanis, S., Sloan, S.A., Zhang, Y., Enge, M., Caneda, C., Shuer, L.M., Hayden Gephart, M.G., Barres, B.A., and Quake, S.R. (2015). A survey of human brain transcriptome diversity at the single cell level. *Proc. Natl. Acad. Sci. U S A* 112, 7285–7290. <https://doi.org/10.1073/pnas.1507125112>.
- Fishell, G. (2007). Perspectives on the developmental origins of cortical interneuron diversity. *Novartis Found. Symp.* 288, 21–35, discussion 35–44, 96–28.
- Fregnan, F., Gnavi, S., Macri, L., Perroteau, I., and Gambarotta, G. (2014). The four isoforms of the tyrosine kinase receptor ErbB4 provide neural progenitor cells with an adhesion preference for the transmembrane type III isoform of the ligand neuregulin 1. *Neuroreport* 25, 233–241. <https://doi.org/10.1097/WNR.0000000000000073>.
- Gelman, D., Griveau, A., Dehorter, N., Teissier, A., Varela, C., Pla, R., Pierani, A., and Marin, O. (2011). A wide diversity of cortical GABAergic interneurons derives from the embryonic preoptic area. *J. Neurosci.* 31, 16570–16580. <https://doi.org/10.1523/JNEUROSCI.4068-11.2011>.
- Gelman, D.M., and Marin, O. (2010). Generation of interneuron diversity in the mouse cerebral cortex. *Eur. J. Neurosci.* 31, 2136–2141. <https://doi.org/10.1111/j.1460-9568.2010.07267.x>.
- Gelman, D.M., Marin, O., and Rubenstein, J.L.R. (2012). The generation of cortical interneurons. In *Jasper's Basic Mechanisms of the Epilepsies, Fourth Edition*, J.L. Noebels, M. Avoli, M.A. Rogawski, R.W. Olsen, and A.V. Delgado-Escueta, eds. (Oxford University Press).
- Ghanem, N., Yu, M., Poitras, L., Rubenstein, J.L., and Ekker, M. (2008). Characterization of a distinct subpopulation of striatal projection neurons expressing the *Dlx* genes in the basal ganglia through the activity of the 156ii enhancer. *Dev. Biol.* 322, 415–424. <https://doi.org/10.1016/j.ydbio.2008.07.029>.
- Habib, N., Avraham-Davidi, I., Basu, A., Burks, T., Shekhar, K., Hoffree, M., Choudhury, S.R., Aguet, F., Gelfand, E., Ardlie, K., et al. (2017). Massively parallel single-nucleus RNA-seq with DroNc-seq. *Nat. Methods* 14, 955–958. <https://doi.org/10.1038/nmeth.4407>.
- Huang, K., Wu, Z., Liu, Z., Hu, G., Yu, J., Chang, K.H., Kim, K.P., Le, T., Faull, K.F., Rao, N., et al. (2014). Selective demethylation and altered gene expression are associated with ICF syndrome in human-induced pluripotent stem cells and mesenchymal stem cells. *Hum. Mol. Genet.* 23, 6448–6457. <https://doi.org/10.1093/hmg/ddu365>.
- Ito-Ishida, A., Ure, K., Chen, H., Swann, J.W., and Zoghbi, H.Y. (2015). Loss of MeCP2 in parvalbumin-and somatostatin-expressing neurons in mice leads to distinct Rett syndrome-like phenotypes. *Neuron* 88, 651–658. <https://doi.org/10.1016/j.neuron.2015.10.029>.
- Kishino, T., Lalonde, M., and Wagstaff, J. (1997). UBE3A/E6-AP mutations cause Angelman syndrome. *Nat. Genet.* 15, 70–73. <https://doi.org/10.1038/ng0197-70>.
- Lake, B.B., Ai, R., Kaeser, G.E., Salathia, N.S., Yung, Y.C., Liu, R., Wildberg, A., Gao, D., Fung, H.L., Chen, S., et al. (2016). Neuronal subtypes and diversity revealed by single-nucleus RNA sequencing of the human brain. *Science* 352, 1586–1590. <https://doi.org/10.1126/science.aaf1204>.
- Lim, L., Mi, D., Llorca, A., and Marin, O. (2018). Development and functional diversification of cortical interneurons. *Neuron* 100, 294–313. <https://doi.org/10.1016/j.neuron.2018.10.009>.
- Lopez, A.J. (1998). Alternative splicing of pre-mRNA: developmental consequences and mechanisms of regulation. *Annu. Rev. Genet.* 32, 279–305. <https://doi.org/10.1146/annurev.genet.32.1.279>.
- Macosko, E.Z., Basu, A., Satija, R., Nemes, J., Shekhar, K., Goldman, M., Tirosh, I., Bialas, A.R., Kamitaki, N., Martersteck, E.M., et al. (2015). Highly parallel genome-wide expression profiling of individual cells using nanoliter droplets. *Cell* 161, 1202–1214. <https://doi.org/10.1016/j.cell.2015.05.002>.
- Marin, O. (2013). Human cortical interneurons take their time. *Cell Stem Cell* 12, 497–499. <https://doi.org/10.1016/j.stem.2013.04.017>.
- Marin, O., Anderson, S.A., and Rubenstein, J.L. (2000). Origin and molecular specification of striatal interneurons. *J. Neurosci.* 20, 6063–6076.
- Maroof, A.M., Keros, S., Tyson, J.A., Ying, S.W., Ganat, Y.M., Merkle, F.T., Liu, B., Goulburn, A., Stanley, E.G., Elefanty, A.G., et al. (2013). Directed differentiation and functional maturation of cortical interneurons from human embryonic stem cells. *Cell Stem Cell* 12, 559–572. <https://doi.org/10.1016/j.stem.2013.04.008>.
- Martinez-Losa, M., Tracy, T.E., Ma, K., Verret, L., Clemente-Perez, A., Khan, A.S., Cobos, I., Ho, K., Gan, L., Mucke, L., et al. (2018). Nav1.1-Overexpressing interneuron transplants restore brain rhythms and cognition in a mouse model of alzheimer's disease.





- Neuron 98, 75–89 e75. <https://doi.org/10.1016/j.neuron.2018.02.029>.
- Matsuura, T., Sutcliffe, J.S., Fang, P., Galjaard, R.J., Jiang, Y.H., Benton, C.S., Rommens, J.M., and Beaudet, A.L. (1997). De novo truncating mutations in E6-AP ubiquitin-protein ligase gene (UBE3A) in Angelman syndrome. *Nat. Genet.* 15, 74–77. <https://doi.org/10.1038/ng0197-74>.
- Mayer, C., Hafemeister, C., Bandler, R.C., Machold, R., Batista Brito, R., Jaglin, X., Allaway, K., Butler, A., Fishell, G., and Satija, R. (2018). Developmental diversification of cortical inhibitory interneurons. *Nature* 555, 457–462. <https://doi.org/10.1038/nature25999>.
- Moarefi, A.H., and Chedin, F. (2011). ICF syndrome mutations cause a broad spectrum of biochemical defects in DNMT3B-mediated de novo DNA methylation. *J. Mol. Biol.* 409, 758–772. <https://doi.org/10.1016/j.jmb.2011.04.050>.
- Nicholas, C.R., Chen, J., Tang, Y., Southwell, D.G., Chalmers, N., Vogt, D., Arnold, C.M., Chen, Y.J., Stanley, E.G., Elefanty, A.G., et al. (2013). Functional maturation of hPSC-derived forebrain interneurons requires an extended timeline and mimics human neural development. *Cell Stem Cell* 12, 573–586. <https://doi.org/10.1016/j.stem.2013.04.005>.
- Ohashi, M., Korsakova, E., Allen, D., Lee, P., Fu, K., Vargas, B.S., Cinkornpumin, J., Salas, C., Park, J.C., Germanguz, I., et al. (2018). Loss of MECP2 leads to activation of P53 and neuronal senescence. *Stem Cell Reports* 10, 1453–1463. <https://doi.org/10.1016/j.stemcr.2018.04.001>.
- Patra, H.K., and Turner, A.P. (2014). The potential legacy of cancer nanotechnology: cellular selection. *Trends Biotechnol.* 32, 21–31. <https://doi.org/10.1016/j.tibtech.2013.10.004>.
- Polioudakis, D., de la Torre-Ubieta, L., Langerman, J., Elkins, A.G., Shi, X., Stein, J.L., Vuong, C.K., Nichterwitz, S., Gevorgian, M., Opland, C.K., et al. (2019). A single-cell transcriptomic atlas of human neocortical development during mid-gestation. *Neuron* 103, 785–801.e8. <https://doi.org/10.1016/j.neuron.2019.06.011>.
- Rakic, S., Kanatani, S., Hunt, D., Faux, C., Cariboni, A., Chiara, F., Khan, S., Wansbury, O., Howard, B., Nakajima, K., et al. (2015). Cdk5 phosphorylation of ErbB4 is required for tangential migration of cortical interneurons. *Cereb. Cortex* 25, 991–1003. <https://doi.org/10.1093/cercor/bht290>.
- Sagie, S., Ellran, E., Katzir, H., Shaked, R., Yehezkel, S., Laevsky, I., Ghanayim, A., Geiger, D., Tzukerman, M., and Selig, S. (2014). Induced pluripotent stem cells as a model for telomeric abnormalities in ICF type I syndrome. *Hum. Mol. Genet.* 23, 3629–3640. <https://doi.org/10.1093/hmg/ddu071>.
- Samarasinghe, R.A., Miranda, O.A., Buth, J.E., Mitchell, S., Fernando, I., Watanabe, M., Allison, T.F., Kurdian, A., Fotion, N.N., Gandal, M.J., et al. (2021). Identification of neural oscillations and epileptiform changes in human brain organoids. *Nat Neurosci*, In press. <https://doi.org/10.1038/s41593-021-00906-5>.
- Saunders, A., Macosko, E.Z., Wysoker, A., Goldman, M., Krienen, F.M., de Rivera, H., Bien, E., Baum, M., Bortolin, L., Wang, S., et al. (2018). Molecular diversity and specializations among the cells of the adult mouse brain. *Cell* 174, 1015–1030.e6. <https://doi.org/10.1016/j.cell.2018.07.028>.
- Schuman, B., Machold, R.P., Hashikawa, Y., Fuzik, J., Fishell, G.J., and Rudy, B. (2019). Four unique interneuron populations reside in neocortical layer 1. *J. Neurosci.* 39, 125–139. <https://doi.org/10.1523/JNEUROSCI.1613-18.2018>.
- Sugiyama, K., Brunori, A., and Mayer, M.L. (1989). Glial uptake of excitatory amino acids influences neuronal survival in cultures of mouse hippocampus. *Neuroscience* 32, 779–791. [https://doi.org/10.1016/0306-4522\(89\)90298-4](https://doi.org/10.1016/0306-4522(89)90298-4).
- Turner, C.P., Pulciani, D., and Rivkees, S.A. (2002a). Reduction in intracellular calcium levels induces injury in developing neurons. *Exp. Neurol.* 178, 21–32. <https://doi.org/10.1006/exnr.2002.8027>.
- Turner, R.W., Lemon, N., Doiron, B., Rashid, A.J., Morales, E., Longtin, A., Maler, L., and Dunn, R.J. (2002b). Oscillatory burst discharge generated through conditional backpropagation of dendritic spikes. *J. Physiol. Paris* 96, 517–530. [https://doi.org/10.1016/S0928-4257\(03\)00007-X](https://doi.org/10.1016/S0928-4257(03)00007-X).
- Ure, K., Lu, H., Wang, W., Ito-Ishida, A., Wu, Z., He, L.J., Sztainberg, Y., Chen, W., Tang, J., and Zoghbi, H.Y. (2016). Restoration of MeCP2 expression in GABAergic neurons is sufficient to rescue multiple disease features in a mouse model of Rett syndrome. *eLife* 5, e14198. <https://doi.org/10.7554/eLife.14198>.
- Villar-Cervino, V., Kappeler, C., Nobrega-Pereira, S., Henkemeyer, M., Rago, L., Nieto, M.A., and Marin, O. (2015). Molecular mechanisms controlling the migration of striatal interneurons. *J. Neurosci.* 35, 8718–8729. <https://doi.org/10.1523/JNEUROSCI.4317-14.2015>.
- Voineagu, I., Wang, X., Johnston, P., Lowe, J.K., Tian, Y., Horvath, S., Mill, J., Cantor, R.M., Blencowe, B.J., and Geschwind, D.H. (2011). Transcriptomic analysis of autistic brain reveals convergent molecular pathology. *Nature* 474, 380–384. <https://doi.org/10.1038/nature10110>.
- Wamsley, B., and Fishell, G. (2017). Genetic and activity-dependent mechanisms underlying interneuron diversity. *Nat. Rev. Neurosci.* 18, 299–309. <https://doi.org/10.1038/nrn.2017.30>.
- Wamsley, B., Jaglin, X.H., Favuzzi, E., Quattrocchio, G., Nigro, M.J., Yusuf, N., Khodadadi-Jamayran, A., Rudy, B., and Fishell, G. (2018). Rbfox1 mediates cell-type-specific splicing in cortical interneurons. *Neuron* 100, 846–859.e7. <https://doi.org/10.1016/j.neuron.2018.09.026>.
- Wonders, C.P., and Anderson, S.A. (2006). The origin and specification of cortical interneurons. *Nat. Rev. Neurosci.* 7, 687–696. <https://doi.org/10.1038/nrn1954>.
- Yang, N., Chanda, S., Marro, S., Ng, Y.H., Janas, J.A., Haag, D., Ang, C.E., Tang, Y., Flores, Q., Mall, M., et al. (2017). Generation of pure GABAergic neurons by transcription factor programming. *Nat. Methods* 14, 621–628. <https://doi.org/10.1038/nmeth.4291>.
- Zeisel, A., Munoz-Manchado, A.B., Codeluppi, S., Lonnerberg, P., La Manno, G., Jureus, A., Marques, S., Munguba, H., He, L., Betsholtz, C., et al. (2015). Brain structure. Cell types in the mouse cortex and hippocampus revealed by single-cell RNA-seq. *Science* 347, 1138–1142. <https://doi.org/10.1126/science.aaa1934>.

**Stem Cell Reports, Volume 16**

## **Supplemental Information**

### **Defining the nature of human pluripotent stem cell-derived interneurons via single-cell analysis**

**Thomas Allison, Justin Langerman, Shan Sabri, Marcos Otero-Garcia, Andrew Lund, John Huang, Xiaofei Wei, Ranmal A. Samarasinghe, Damon Polioudakis, Istvan Mody, Inma Cobos, Bennett G. Novitch, Daniel H. Geschwind, Kathrin Plath, and William E. Lowry**

## Supplementary Material

### Supplemental Table 1

**Table S1: Summary of data sets used in this study**

| samples                                              | cell line/sample information                                                                 | RNA-sequencing method                    | associated publication                                                                                                                       | accession number                                                                                                    |
|------------------------------------------------------|----------------------------------------------------------------------------------------------|------------------------------------------|----------------------------------------------------------------------------------------------------------------------------------------------|---------------------------------------------------------------------------------------------------------------------|
| 3i directed interneuron differentiation              | hESCs, HES3:NKX2-1-GFP                                                                       | single cell RNA Sequencing, Drop-Seq     | this study                                                                                                                                   | GEO #GSE180132                                                                                                      |
| AD-directed interneuron differentiation, replicate 1 | hESCs, H9                                                                                    | single cell RNA Sequencing, Drop-Seq     | this study                                                                                                                                   | GEO #GSE180132                                                                                                      |
| AD-directed interneuron differentiation, replicate 2 | hESCs, H9                                                                                    | single cell RNA Sequencing, Drop-Seq     | this study                                                                                                                                   | GEO #GSE180132                                                                                                      |
| orglNs, day 56                                       | hESCs, H9 - unfused mix of dorsal cortex (Cx) and ventral ganglionic eminence (GE) organoids | single cell RNA Sequencing, 10x Genomics | Samarasinghe et al, 2021, accepted                                                                                                           | GEO #GSE165577                                                                                                      |
| orglNs, day 70                                       | hESCs, H9 - fusion of dorsal cortex (Cx) and ventral ganglionic eminence (GE) organoids      | single cell RNA Sequencing, 10x Genomics | Samarasinghe et al, 2021, accepted                                                                                                           | GEO #GSE165577                                                                                                      |
| orglNs, day 100                                      | hESCs, H9 - fusion of dorsal cortex (Cx) and ventral ganglionic eminence (GE) organoids      | single cell RNA Sequencing, 10x Genomics | Samarasinghe et al, 2021, accepted                                                                                                           | GEO #GSE165577                                                                                                      |
| mINs adult brain #1, frozen archived cortex          | hESCs, H1- D24 of neural induction via Maroof et al. 2003 protocol                           | single cell RNA Sequencing, Smart-seq2   | Close et al, 2017, <a href="https://www.ncbi.nlm.nih.gov/pmc/articles/PMC5480972/">https://www.ncbi.nlm.nih.gov/pmc/articles/PMC5480972/</a> | GSE93593                                                                                                            |
| adult brain #2, frozen archived cortex               | Male, Age 71, Frontal Cortex                                                                 | Drop-seq, NextSEQ500                     | Inma Cobos, unpublished                                                                                                                      | GEO #GSE181715                                                                                                      |
| adult brain #3, frozen archived cortex               | Female, Age 81, Frontal Cortex                                                               | Drop-seq, NextSEQ500                     | Inma Cobos, unpublished                                                                                                                      | GEO #GSE181715                                                                                                      |
| adult brain #4, frozen archived cortex               | Male, Age 83, Frontal Cortex                                                                 | Drop-seq, NextSEQ500                     | Inma Cobos, unpublished                                                                                                                      | GEO #GSE181715                                                                                                      |
| adult brain #5, frozen archived cortex               | Male, Age 61, Frontal Cortex                                                                 | Drop-seq, NextSEQ500                     | Inma Cobos, unpublished                                                                                                                      | GEO #GSE181715                                                                                                      |
| adult brain #6, frozen archived cortex               | Female, Age 51, Frontal Cortex                                                               | Drop-seq, NextSEQ500                     | Inma Cobos, unpublished                                                                                                                      | GEO #GSE181715                                                                                                      |
| adult brain #6, frozen archived cortex               | Female, Age 89, Frontal Cortex                                                               | Drop-seq, NextSEQ500                     | Inma Cobos, unpublished                                                                                                                      | GEO #GSE181715                                                                                                      |
| fetal brain, 15pcw                                   | CP, and CZ dissection                                                                        | single cell RNA Sequencing, Drop-Seq     | Polioudakis et al., 2019                                                                                                                     | dbGaP: phs001836                                                                                                    |
| fetal brain, 17pcw                                   | CP, and CZ dissection                                                                        | single cell RNA Sequencing, Drop-Seq     | Polioudakis et al., 2019                                                                                                                     | dbGaP: phs001836                                                                                                    |
| Allen Brain Institute, adult brain                   | Frontal Cortex                                                                               | sn RNA-seq, 10x Genomics                 | Allen Brain Institute                                                                                                                        | <a href="https://portal.brain-map.org/atlas-and-data/rnaseq">https://portal.brain-map.org/atlas-and-data/rnaseq</a> |

## Materials and Methods

### Cell Culture

#### *TF-directed differentiation*

For the TF programming method, undifferentiated cells were maintained as already described.

For lentiviral infection, hESCs (H9, Wicell) were plated at a density of 1 x 10<sup>4</sup> cells/cm<sup>2</sup> in a Matrigel (Corning #354234) coated 6 well plate in mTESR (StemCell Technologies (SCT) #85850)

and 10 $\mu$ m Y27632 (Tocris). After 24h, media was changed to fresh mTESR without Y27632 for a further 8h. After 8h, surviving cells were infected with pTET-O-FUW-Ascl1-puromycin (Addgene #97329) and pTet-O-FUW-Dlx2-hygromycin (Addgene #97330), FUW-M2rtTA (Addgene #20342) containing lentiviruses, kind gifts from Marius Wernig. Infected cells were maintained in mTESR and Matrigel to establish cell lines. For interneuron programming, we adopted a published method that included co-culture with murine glial cells directly isolated from brain (Yang et al., 2017). In short, infected and selected hESCs were dissociated into a single cell suspension and plated into matrigel coated T25 flasks in mTESR and 10 $\mu$ m Y27632. After 24h, media was replaced with mTESR without Y27632 and cells were maintained until confluency was reached. Once confluent, cells were kept in mTESR with the addition of 1 $\mu$ g/mL of Doxycycline (Sigma) to induce *ASCL1/DLX2* expression. After 24h of induction, puromycin (1 $\mu$ g/mL) and hygromycin (100 $\mu$ g/mL) were added to the mTESR/DOX media for a further 2 days. On day 4 of induction, puromycin was withdrawn, but hygromycin maintained for additional 3 days. On day 7 of induction, media was changed to NBND and 10 $\mu$ m pluriSIn-1 (SCT) was added for 24h to kill proliferating cells and thus reduce the amount of non-neuronal cells in the culture. Induced interneurons were maintained in NBND for the remainder of the experiments.

### *3i directed differentiation towards interneurons (3i)*

Directed differentiation was performed as described before [1]. Briefly, the hESC line HES3:NKX2-1-GFP) was maintained in mTESR on Matrigel-coated plates. Cells were passaged when confluent dishes using ReLeSR (SCT #05972). hESCs were dissociated to single cell with TrypLE and seeded into a 24-well plate coated with Matrigel at a concentration of 3 x 10<sup>5</sup> cells/cm<sup>2</sup> in mTESR and 10 $\mu$ m Y26732. After 24h, cells were washed with PBS and media was changed to NIMX. After 4 days in NIMX, media was changed to 75% NIMX, 25% N2 for 2 days. Media was then changed to 50% NIMX, 50% N2 for a further 2 days. At this stage, cells were dissociated into single cell suspension using tryple and plated onto fresh Matrigel coated 24-well plates at a



density of  $1.3 \times 10^6$  cells/cm<sup>2</sup>, in 10 $\mu$ M Y27632 and 25% NIMX, 75% N2 media. Media was changed 24h later to remove Y27632 again with 25% NIMX, 75% N2. Neural progenitors were then ventralized using N2/B27 containing 2 $\mu$ M purmorphamine and 100ng/ $\mu$ L SHH for 8 days, with daily media changes. After 8 days, cells were cultured in N2/B27 media without Purmorphamine and SHH for a further 3 days. At this stage, cells were dissociated to a single cell suspension and FACS sorted to enrich for NKX2-1(+) interneuron progenitors. For 2D differentiation, after FACS, interneuron progenitors were plated onto fresh Matrigel coated 24-well plates at a density of  $2.5 \times 10^5$  cells/cm<sup>2</sup> with N2/B27 media and 10 $\mu$ M Y27632. 24h later, media was changed to NBND, which was changed every 3 days for the duration of the experiment. For 3D differentiation, we followed the same protocol as the 2D differentiation, however, at the initial seeding before NIMX, we seeded dissociated undifferentiated hESCs into ultra-non-adhesive u-shaped 96 well plates at a density of 5000 cells/well in mTESR with 10 $\mu$ M Y27632. Once seeded, cells were centrifuged at 1000rpm for 3 mins to pellet cells. EBs routinely formed after 24h and Y27632 was removed and media was replaced with NIMX. All media changes and timings were identical as the 2D method.

## **Electrophysiology**

Neurons marked by lentiviral GFP (prior to co-culture with murine glia) and prepared for whole cell patch-clamp recordings were transferred to a submerged recording chamber at 34°C and perfused at 5 ml/min with artificial cerebrospinal fluid (ACSF) containing (in mM): 126 NaCl, 10 D-glucose, 26 NaHCO<sub>3</sub>, 0.05 MgCl<sub>2</sub>, 2.5 KCl, 1.25 NaH<sub>2</sub>PO<sub>4</sub>, 2 CaCl<sub>2</sub>, 1.5 C<sub>3</sub>H<sub>3</sub>NaO<sub>3</sub>, 1 L-Glutamine (100 % O<sub>2</sub>, pH 7.4, 290– 300 mOsm). All cells were visualized under IR-DIC upright microscope (Olympus BX-51WI, 20x XLUMPlan FL N objective) and whole-cell recordings were obtained with borosilicate patch pipettes (4 - 6 M, King Precision Glass) containing internal solutions (ICS) (in mM): 135 K-methanesulphonate, 5 KCl, 10 HEPES, 2 MgCl<sub>2</sub>, 3 NaCl, 0.2 EGTA, 2 Na<sub>2</sub>ATP, 0.2 NaGTP. The pH of the ICS was adjusted to 7.2 with KOH and its osmolality

was 285 - 290 mOsm. ICS were stored at  $-80^{\circ}\text{C}$  in 1 ml aliquots. Before each experiment, ICS aliquots were thawed to room temperature and kept on ice during recording. All salts were purchased from Sigma-Aldrich.

Recordings were obtained using an Axopatch 200B amplifier (Molecular Devices, San Jose, CA, USA), low-pass filtered at 5 kHz (Bessel, 8-pole) and digitized at 10 kHz with a National Instruments data acquisition board (BNC 2110, National Instruments, Austin, TX, USA). The injected current was programmed with WinWCP software (Strathclyde Electrophysiology Software, UK) and generated with another National Instruments board (USB-6221 National Instruments, Austin, TX, USA). All data were acquired and analyzed with EVAN (custom-designed LabView-based software). Current clamp recording. After achieving stable whole-cell configuration in voltage-clamp, the amplifier was switched to current-clamp mode. Only recordings with series resistances  $< 20 \text{ M}\Omega$  were used and bridge balance compensation was applied while in current-clamp. Action potentials were evoked by current step injections (up to 1200 pA, 100 - 300 ms duration). The patch clamp data were collected from 5 batches of cultured cells prepared with the AD-method. In each batch, there were 2-11 recorded cells. In total, 29 iINs prepared by the AD method were patched. Of these, 14 cells (48%) showed either multiple action potentials firing ( $n=5$  or 17% of total, as in the upper panel of Fig. 1d) or single action potential firing ( $n=9$  or 31% of total, as in the lower panel of Fig. 1d) upon injections of depolarizing current pulses.

### **Fetal tissue dissection**

Fetal tissue samples were prepared by dissecting tissue into small pieces using a razor blade in ice-cold Hank's Balanced Salt Solution (HBSS). Following dissection, the tissue was gently dissociated via enzymatic digestion with papain (Worthington) for 45m-1h in a rotation chamber

at 37C. The resulting cell suspension was then filtered firstly with a 40µm strainer, followed by an ovomucoid gradient (Worthington). Cell survival and yield were quantified with Trypan blue staining before the immediate processing of cells with Drop-seq single cell sequencing[2].

### **Adult brain nuclei extraction**

Frozen adult cortical tissue was tested for RNA quality through assessing the RIN score and only samples with a RIN score above 7 were used. Tissue was first dissected on ice to remove the majority of white matter and chopped into small pieces using a chilled scapel and immediately put into a pre-cooled dounce grinder with 2.4mL of homogenization buffer (Tris pH8 10 mM, MgCl<sub>2</sub> 5 mM, KCl 25 mM, sucrose 250 mM, DTT 1 µM, Protease Inhibitor 0.5x (Complete, Roche #4693159001), RNase inhibitor 0.2 U/µl (NxGen, Lucigen #30281), and 0.1% v/v Triton-x100. The tissue was then homogenized with 30 strokes of the grinder and filtered through a 40µM cell strainer into two 1.5mL eppendorf tubes. Success of extraction and nuclei quality was determined with Trypan Blue staining and counting in a hemocytometer. The homogenate was then centrifuged at 1000g for 8 minutes at 4C, the supernatant aspirated and nuclei gently resuspended in 200µL of homogenization buffer and pooled from both tubes. To remove debris and to attain a pure nuclei preparation, resuspended nuclei were gently mixed with a 50% iodixanol solution to a final concentration of 25% and layered onto 500µL of 29% iodixanol solution in a 1.5mL eppendorf. The tubes were then centrifuged at 13,500g for 20 minutes at 4C, pelleted nuclei were harvested, counted and quality checked with Trypan blue.

### **Flow cytometry of nuclei from adult human brains**

Staining of nuclei was achieved by resuspending nuclei in 500µL immunostaining buffer (PBS pH 7.4, BSA 0.05%, MgCl<sub>2</sub> 5 mM, DNase I 2U/mL, RNase inhibitor 0.2 U/µl), following a 15 min incubation at 4C. After 15 min, the primary antibody was added (anti NeuN, 1:1000; Millipore #MAB377) and the suspension was incubated for a further 40min at 4C. Nuclei were centrifuged

for 5 min at 500g/4C. This process was repeated for the secondary antibody staining (Alexa Fluor 647, 1:1000) and nuclear staining (Hoescht 33258, 5 µg/mL). Nuclei were centrifuged and washed twice in immunostaining buffer.

Once stained, nuclei were resuspended in immunostaining buffer and sorted on a BD SORP FACS Aria II. FSC and SSC were utilized to identify the nuclei population and the UV Trigon 355nm- and Trigon 640nm lasers to assay the expression of Hoechst 33258 and Alexa Fluor. The Hoechst staining was used to gate FSC-W and FSC-H to ensure single nuclei were enriched. Accurate gating of samples was achieved by using unstained and immunoglobulin controls. Nuclei were sorted into 1.5mL eppendorf tubes with 200µl of collection buffer (PBS pH 7.4, RNase inhibitor 1 U/µl). BSA 10% was then added to the tube after sorting for a final concentration of 0.01% and the tube inverted several times. The samples were then processed by single-nuclei drop-seq.

### **Immunostaining**

Cells were fixed with 4% PFA at room temperature for 15 mins, followed with two PBS washes. Cells were blocked using 10% donkey serum/PBS solution for 30 mins at room temperature. Primary antibodies were diluted in staining buffer (PBS, 10% Donkey serum, 0.1% Triton X-100) and incubated with permeabilized cells overnight at 4C. Primary antibody was washed out with x2 PBS washed and secondary antibody along with DAPI was diluted in staining buffer and applied to the cells for a further 1h at 4C. Cells subsequently cells had two PBS washed before being mounted onto microscope slides using VECTASHEILD mounting media (Vector Labs).

### **Single-cell and single nuclei RNA-sequencing**

Drop-seq was run on single cells according to the online protocol v.3.1 (<http://mccarrolllab.com/download/905/>) and the methods as published in the original publication

[3]. Slight modifications were made for single nuclei sequencing, which included increasing the final concentration of Sarkosyl to 0.8% to improve nuclei membrane lysis. Flow rates were also modified such that the oil was set to 16mL/h, cells and beads to 3mL/h to decrease the size of droplets due to the smaller size of nuclei. Additionally, STAMPs were incubated for 5 mins at 72C to facilitate RNA to DNA binding before droplet breakage. Cells and nuclei were prepared in 0.01% BSA/PBS solution and diluted to a concentration of 125,000 cells or nuclei/mL. Barcoded beads were obtained from Chemgenes and the PDMS microfluidic devices were obtained from FlowJem. Libraries were prepared with the Nextera XT DNA library preparation kit (Illumina) according to the manufacturer's instructions. Libraries were subsequently sequenced on the Illumina HiSeq2500 or NextSeq4000 platforms with a modified 100bp pair-end protocol, such that R1 = 25bp and R2 = 75bp to maximize mapping.

### **Processing, Read Alignment and Digital Gene Expression (DGE) Matrix Construction**

The raw drop-seq data was processed using the Drop-seq tools v1.12 pipeline from the McCaroll lab, utilizing the standard parameters as shown in the documentation (<https://github.com/broadinstitute/Drop-seq/releases/tag/v1.12>). In brief, cell and molecular barcodes were extracted from raw sequencing data based on bases 1-12 for cell and 13-20 for molecular barcodes, whilst filtering out reads with poor quality bases (TagBamWithReadSequenceExtended). Subsequently reads were trimmed to remove SMART adapter sequences as well as PolyA tails (FilterBAM, TrimStartingsequence & PolyATrimmer). HiSat2 was used to align these filtered reads to the human reference genome, hg38. Aligned reads were then merged with the unaligned reads to recapture molecular/cell BAM tags and subsequently reads were tagged with 'GE' if they overlapped with gene exons (MergeBamAlignment & TagReadWithGeneExon). Bead synthesis errors were then corrected and uMIs merged (DetectBeadSynthesisErrors). Finally, digital gene expression data (DGEs) were generated using standard parameters (DigitalExpression). For published datasets from

other groups which used the 10x Genomics scRNA-seq platform (see Table S1), data was processed using the Cellranger pipeline.

### **Computational analysis**

Downstream analysis of single cell RNA-seq data was performed using Seurat (<https://satijalab.org/seurat/>) in R software (<https://www.r-project.org/>). Seurat objects were generated with DGEs generated by the drop-seq pipeline. For the scRNA-seq data from iINs and orgINs, cells were filtered based on a 500 cut off for minimum numbers of genes, for snRNA-seq data from the adult brain, fetal cell scRNA-seq and data from the Allen Brain Atlas, based on a 2500 cut off for minimum numbers of genes. Additionally, genes were filtered based on the criteria that they must be present in a minimum of 3 cells, to reduce noise. We employed a global-scaling normalization method to normalize RNA expression measurements for each cell by the total expression, which was then multiplied by a scale factor of 10,000. Highly variable genes by cell were computed and the top 2000 features from each dataset were utilized for subsequent downstream clustering. Canonical correlation analysis was used to identify common sources of variation between datasets, to correct for batch effects. The number of correlation coefficients (CC) to use was determined using elbow plots for with shared correlation strength against CC dimensions number. CC dimensions that showed a plateau for shared correlation strength were utilized and CCA subspaces aligned for subsequent clustering. This distance matrix was then reduced to low-dimensionality using UMAP and clusters identified by a shared nearest neighbor (SNN) modularity optimization-based clustering algorithm. First k-nearest neighbors were calculated to construct the SNN graph. The SNN was then used to optimize the modularity function to determine clusters. For all subsequent analyses, meta, filtered and normalized data were exported from Seurat for integration in various R packages. All correlations were calculated using Pearson correlation values on the normalized data for each group analyzed.



## TF modules

Using the genes defined to be changing across developmental timepoints in Fig. 6, we computed a Pearson gene-to-gene correlation matrix and identified genes with correlation values greater than 0.15. To build modules, we linked hub TFs to all genes if the correlation threshold was satisfied. To ensure our correlation threshold was strict, we performed 750 random permutations of the DGE matrix to empirically estimate a null distribution of correlations for every pair of genes. All permutations resulted in 0 genes that met our threshold, indicating that our correlation values were sufficiently different from the null distribution. We removed target vertices that were not annotated as transcription factors/regulators by the Animal Transcription Factor Database ([bioinfo.life.hust.edu.cn/AnimalTFDB/](http://bioinfo.life.hust.edu.cn/AnimalTFDB/)) and removed modules that did not contain at least two other correlated genes. The average expression of all members in a given module was computed for each cluster by taking the average of all normalized expression value for all genes and cells in the network. For the heatmap, TFs with low expression were removed to reduce noise (< 0.9 average normalized transcripts).

## Supplemental References

1. Close, J.L., et al., *Single-Cell Profiling of an In Vitro Model of Human Interneuron Development Reveals Temporal Dynamics of Cell Type Production and Maturation*. *Neuron*, 2017. **96**(4): p. 949,
2. Polioudakis, D., et al., *A Single-Cell Transcriptomic Atlas of Human Neocortical Development during Mid-gestation*. *Neuron*, 2019. **103**(5): p. 785-801 e8.PMC6831089
3. Macosko, E.Z., et al., *Highly Parallel Genome-wide Expression Profiling of Individual Cells Using Nanoliter Droplets*. *Cell*, 2015. **161**(5): p. 1202-14.PMC4481139
